# Supplementary material for: Strengthened cooperativity of DNA-based cyclic hydrogen-bonded rosettes by subtle functionalization
Source: Royal Society of Chemistry journal article supplement (doi:10.1039/d3ob01391j), 2023-01-01
Supplement: d3ob01391j1.pdf [file d3ob01391j1.pdf]

## SUPPORTING INFORMATION

### STRENGTHENED COOPERATIVITY OF DNA-BASED CYCLIC HYDROGEN-BONDED ROSETTES BY SUBTLE FUNCTIONALIZATION

David Almacellas,<sup>a</sup> Célia Fonseca Guerra,<sup>b,\*</sup> Jordi Poater<sup>a,c,\*</sup>

<sup>a</sup> *Departament de Química Inorgànica i Orgànica & IQTCUB, Universitat de Barcelona, Martí i Franquès 1-11, 08028 Barcelona, Spain.*

<sup>b</sup> *Department of Chemistry and Pharmaceutical Sciences, AIMMS, Vrije Universiteit Amsterdam, De Boelelaan 1108, 1081 HZ Amsterdam, The Netherlands.*

<sup>c</sup> *ICREA, Passeig Lluís Companys 23, 08010 Barcelona, Spain.*

\* E-mails: [c.fonsecaguerra@vu.nl](mailto:c.fonsecaguerra@vu.nl); [jordi.poater@ub.edu](mailto:jordi.poater@ub.edu)

#### Contents

**Figure S1.** Optimized structures of hydrogen-bonded dimers of AAA<sup>OH</sup> together with its tautomer with O-CH<sub>3</sub>, both with C<sub>s</sub> symmetry computed at ZORA-BLYP-D3(BJ)/TZ2P level. Bond lengths (in Å) and bonding energies (between brackets, in kcal mol<sup>-1</sup>, computed with monomers in C<sub>1</sub> symmetry) are included. p. SI3

**Table S1.** Energy decomposition analysis (in kcal mol<sup>-1</sup>) for the formation of the AAD, AA, AAA and AAA<sup>OH</sup> rosettes in a stepwise one-way direction, computed at ZORA-BLYP-D3(BJ)/TZ2P level. p. SI4

**Figure S2.** Schematic representation of the attractive terms of the energy decomposition analysis (in kcal mol<sup>-1</sup>) for the formation in a stepwise one-way direction of a) AAD, and b) AAA<sup>OH</sup> rosettes. Computed at ZORA-BLYP-D3(BJ)/TZ2P level. p. SI5

**Figure S3.** Schematic representation of the energy decomposition analysis (in kcal mol<sup>-1</sup>) for the formation in a stepwise one-way direction of a) AAD, and b) AAA<sup>OH</sup> rosettes. Computed at ZORA-BLYP-D3(BJ)/TZ2P level. p. SI6

**Figure S4.** VDD charges (in milli-electrons) in the formation of AAD, AA, AAA and AAA<sup>OH</sup> cyclic structures. Values in black are whole charges of the monomer, whereas values in blue and red correspond to charges of hydrogen-bond acceptor and donor atoms, respectively. p. SI7

**Figure S5.** N-H unoccupied  $\sigma_{\text{LUMO}}$  orbitals and oxygen and nitrogen lone-pair  $\sigma_{\text{HOMO}}$  orbitals of the front atoms of AAD and their corresponding energies (in eV) for stepwise M<sub>1</sub> and M<sub>3</sub> states, computed at ZORA-BLYP-D3(BJ)/TZ2P level. p. SI8

**Figure S6.** N-H unoccupied  $\sigma_{\text{LUMO}}$  orbitals and oxygen and nitrogen lone-pair  $\sigma_{\text{HOMO}}$  orbitals of the front atoms of AAA<sup>OH</sup> and their corresponding energies (in eV) for stepwise M<sub>1</sub> and M<sub>3</sub> states, computed at ZORA-BLYP-D3(BJ)/TZ2P level. p. SI9

**Figure S7.** N-H unoccupied  $\sigma_{\text{LUMO}}$  orbitals and oxygen and nitrogen lone-pair  $\sigma_{\text{HOMO}}$  orbitals of the front atoms of the AAD, AA, AAA and AAA<sup>OH</sup> monomers (equilibrium geometries) and their corresponding energies (in eV).

p. SI10

**Table S2.** Cartesian coordinates (in Å) and total ADF electronic energies (in kcal mol<sup>-1</sup>) of all monomers optimized at ZORA-BLYP-D3(BJ)/TZ2P with restricted C<sub>s</sub> symmetry.

p. SI11

**Table S3.** Cartesian coordinates (in Å) and total ADF electronic energies (in kcal mol<sup>-1</sup>) of all monomers optimized at ZORA-BLYP-D3(BJ)/TZ2P with C<sub>1</sub> symmetry.

p. SI13

**Table S4.** Cartesian coordinates (in Å) and total ADF electronic energies (in kcal mol<sup>-1</sup>) of all dimers optimized at ZORA-BLYP-D3(BJ)/TZ2P with restricted C<sub>s</sub> symmetry.

p. SI15

**Table S5.** Cartesian coordinates (in Å) and total ADF electronic energies (in kcal mol<sup>-1</sup>) of all dimers optimized at ZORA-BLYP-D3(BJ)/TZ2P with C<sub>1</sub> symmetry.

p. SI18

**Table S6.** Cartesian coordinates (in Å) and total ADF electronic energies (in kcal mol<sup>-1</sup>) of all rosettes optimized at ZORA-BLYP-D3(BJ)/TZ2P with restricted C<sub>s</sub> symmetry.

p. SI21

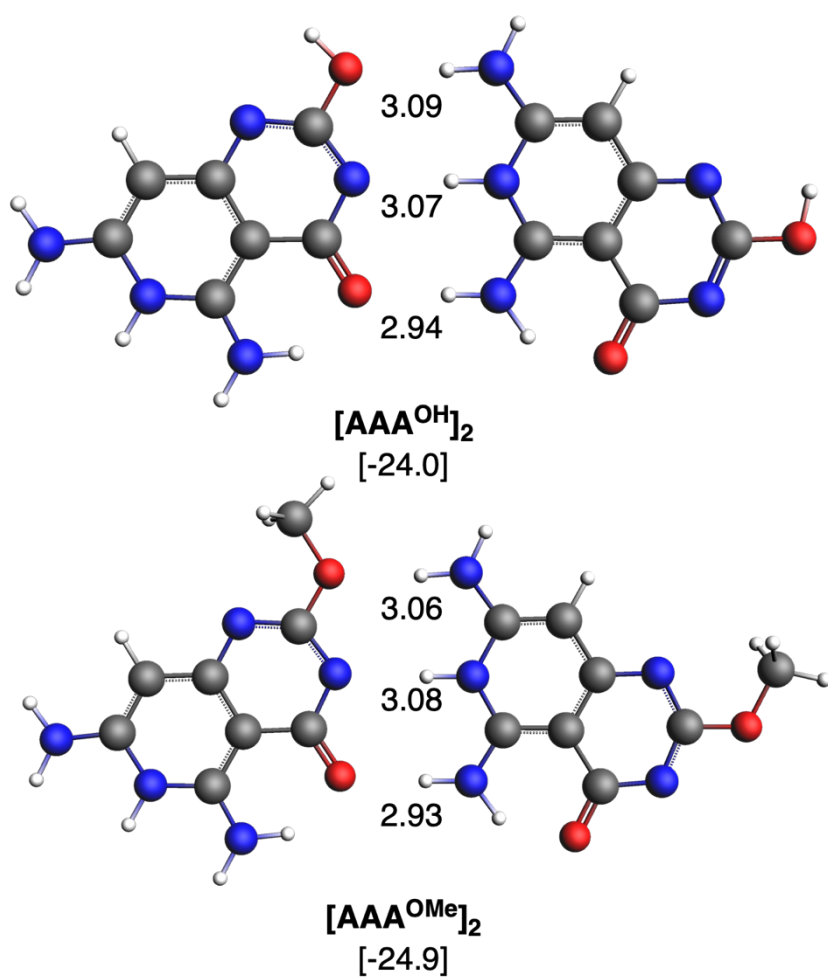

**Figure S1.** Optimized structures of hydrogen-bonded dimers of  $AAA^{OH}$  together with its tautomer with  $O-CH_3$ , both with  $C_s$  symmetry computed at ZORA-BLYP-D3(BJ)/TZ2P level. Bond lengths (in Å) and bonding energies (between brackets, in  $\text{kcal mol}^{-1}$ , computed with monomers in  $C_1$  symmetry) are included.

**Table S1.** Energy decomposition analysis (in kcal mol<sup>-1</sup>) for the formation of the **AAD**, **AA**, **AAA** and **AAA<sup>OH</sup>** rosettes in a stepwise one-way direction, computed at ZORA-BLYP-D3(BJ)/TZ2P level.

| <b>AAD</b>                      | <b>1+1</b> | <b>2+1</b> | <b>3+1</b> | <b>4+1</b> | <b>5+1</b> | <b>Synergy</b> |
|---------------------------------|------------|------------|------------|------------|------------|----------------|
| $\Delta E_{\text{int}}$         | -33.6      | -35.7      | -36.5      | -37.5      | -75.5      | -12.7          |
| $\Delta E_{\text{oi}}^{\sigma}$ | -26.6      | -26.9      | -27.0      | -27.1      | -55.6      | -3.7           |
| $\Delta E_{\text{oi}}^{\pi}$    | -4.4       | -4.7       | -4.8       | -4.9       | -10.5      | -2.8           |
| $\Delta E_{\text{oi}}$          | -31.0      | -31.6      | -31.8      | -32.1      | -66.1      | -6.5           |
| $\Delta E_{\text{Pauli}}$       | 51.8       | 51.4       | 51.3       | 51.4       | 103.9      | -1.0           |
| $\Delta V_{\text{elstat}}$      | -47.8      | -48.9      | -49.3      | -50.1      | -100.0     | -5.2           |
| $\Delta E_{\text{disp}}$        | -6.6       | -6.6       | -6.7       | -6.7       | -13.3      | 0.0            |
| <b>AA</b>                       | <b>1+1</b> | <b>2+1</b> | <b>3+1</b> | <b>4+1</b> | <b>5+1</b> | <b>Synergy</b> |
| $\Delta E_{\text{int}}$         | -24.2      | -28.2      | -29.6      | -31.3      | -66.6      | -32.1          |
| $\Delta E_{\text{oi}}^{\sigma}$ | -19.3      | -20.3      | -20.6      | -20.9      | -44.5      | -9.4           |
| $\Delta E_{\text{oi}}^{\pi}$    | -3.3       | -3.9       | -4.1       | -4.5       | -11.1      | -7.2           |
| $\Delta E_{\text{oi}}$          | -22.6      | -24.1      | -24.7      | -25.3      | -55.6      | -16.6          |
| $\Delta E_{\text{Pauli}}$       | 39.5       | 39.0       | 38.9       | 38.8       | 79.0       | -1.8           |
| $\Delta V_{\text{elstat}}$      | -35.7      | -37.7      | -38.4      | -39.3      | -79.1      | -13.7          |
| $\Delta E_{\text{disp}}$        | -5.4       | -5.4       | -5.4       | -5.5       | -10.9      | 0.0            |
| <b>AAA</b>                      | <b>1+1</b> | <b>2+1</b> | <b>3+1</b> | <b>4+1</b> | <b>5+1</b> | <b>Synergy</b> |
| $\Delta E_{\text{int}}$         | -26.7      | -35.9      | -39.9      | -44.9      | -92.5      | -61.2          |
| $\Delta E_{\text{oi}}^{\sigma}$ | -17.8      | -19.6      | -20.3      | -20.9      | -45.6      | -17.1          |
| $\Delta E_{\text{oi}}^{\pi}$    | -3.2       | -4.2       | -4.7       | -5.3       | -14.1      | -12.0          |
| $\Delta E_{\text{oi}}$          | -21.0      | -23.8      | -25.0      | -26.2      | -60.7      | -30.1          |
| $\Delta E_{\text{Pauli}}$       | 38.9       | 37.9       | 37.7       | 37.5       | 77.1       | -4.1           |
| $\Delta V_{\text{elstat}}$      | -38.9      | -44.2      | -46.8      | -50.4      | -97.3      | -27.0          |
| $\Delta E_{\text{disp}}$        | -5.7       | -5.8       | -5.8       | -5.8       | -11.6      | 0.0            |
| <b>AAA<sup>OH</sup></b>         | <b>1+1</b> | <b>2+1</b> | <b>3+1</b> | <b>4+1</b> | <b>5+1</b> | <b>Synergy</b> |
| $\Delta E_{\text{int}}$         | -29.4      | -39.1      | -43.2      | -48.4      | -100.0     | -66.2          |
| $\Delta E_{\text{oi}}^{\sigma}$ | -21.8      | -23.8      | -24.4      | -25.3      | -56.6      | -20.6          |
| $\Delta E_{\text{oi}}^{\pi}$    | -3.5       | -4.4       | -5.4       | -5.5       | -14.6      | -12.3          |
| $\Delta E_{\text{oi}}$          | -25.3      | -28.2      | -29.8      | -30.8      | -71.2      | -32.9          |
| $\Delta E_{\text{Pauli}}$       | 46.8       | 45.6       | 45.4       | 45.2       | 93.0       | -4.7           |
| $\Delta V_{\text{elstat}}$      | -44.5      | -50.1      | -52.4      | -56.4      | -109.0     | -28.6          |
| $\Delta E_{\text{disp}}$        | -6.4       | -6.4       | -6.4       | -6.4       | -12.8      | 0.0            |

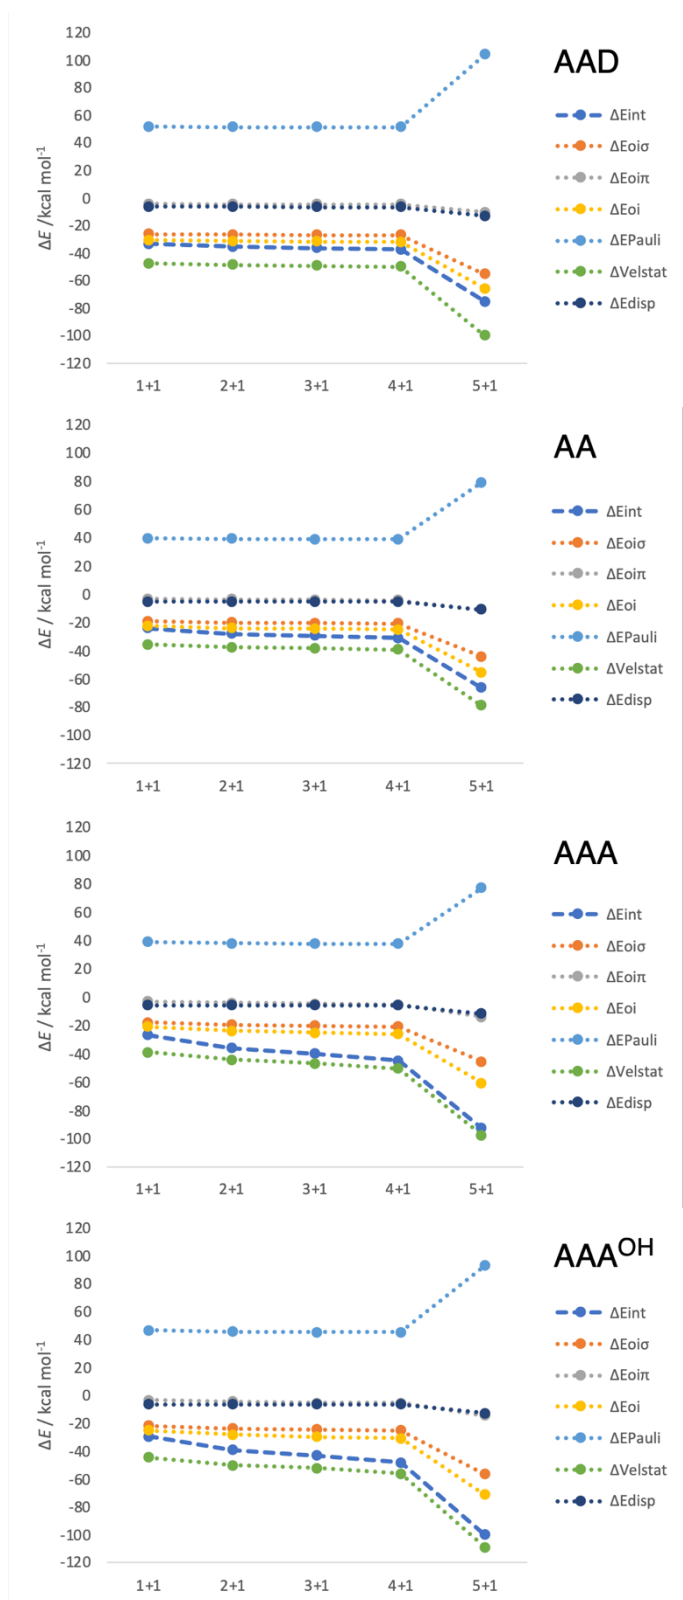

**Figure S2.** Schematic representation of the energy decomposition analysis (in kcal mol<sup>-1</sup>) for the formation in a stepwise one-way direction of **AAD**, **AA**, **AAA** and **AAA<sup>OH</sup>** rosettes. Computed at ZORA-BLYP-D3(BJ)/TZ2P level.

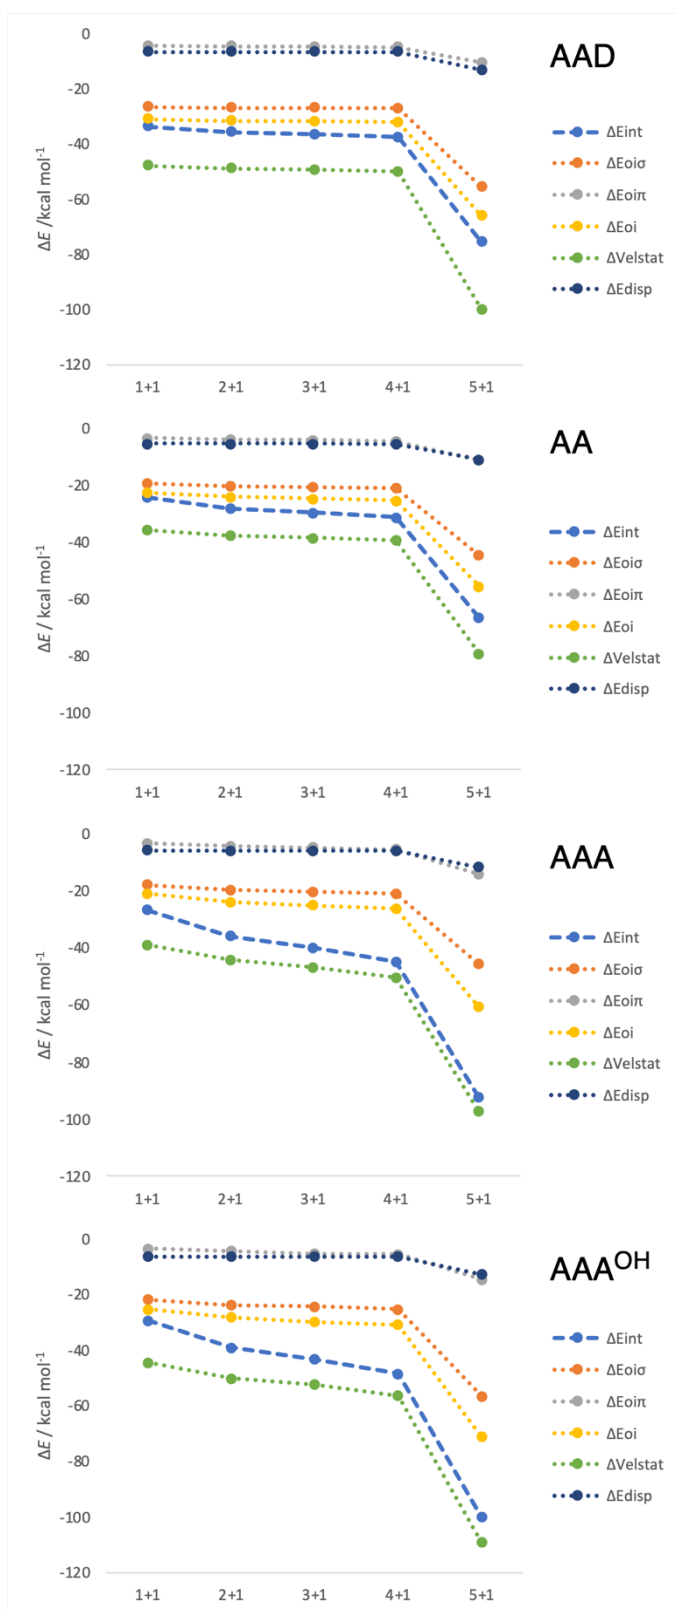

**Figure S3.** Schematic representation of the attractive terms of the energy decomposition analysis (in  $\text{kcal mol}^{-1}$ ) for the formation in a stepwise one-way direction of **AAD**, **AA**, **AAA** and  **$\text{AAA}^{\text{OH}}$**  rosettes. Computed at ZORA-BLYP-D3(BJ)/TZ2P level.

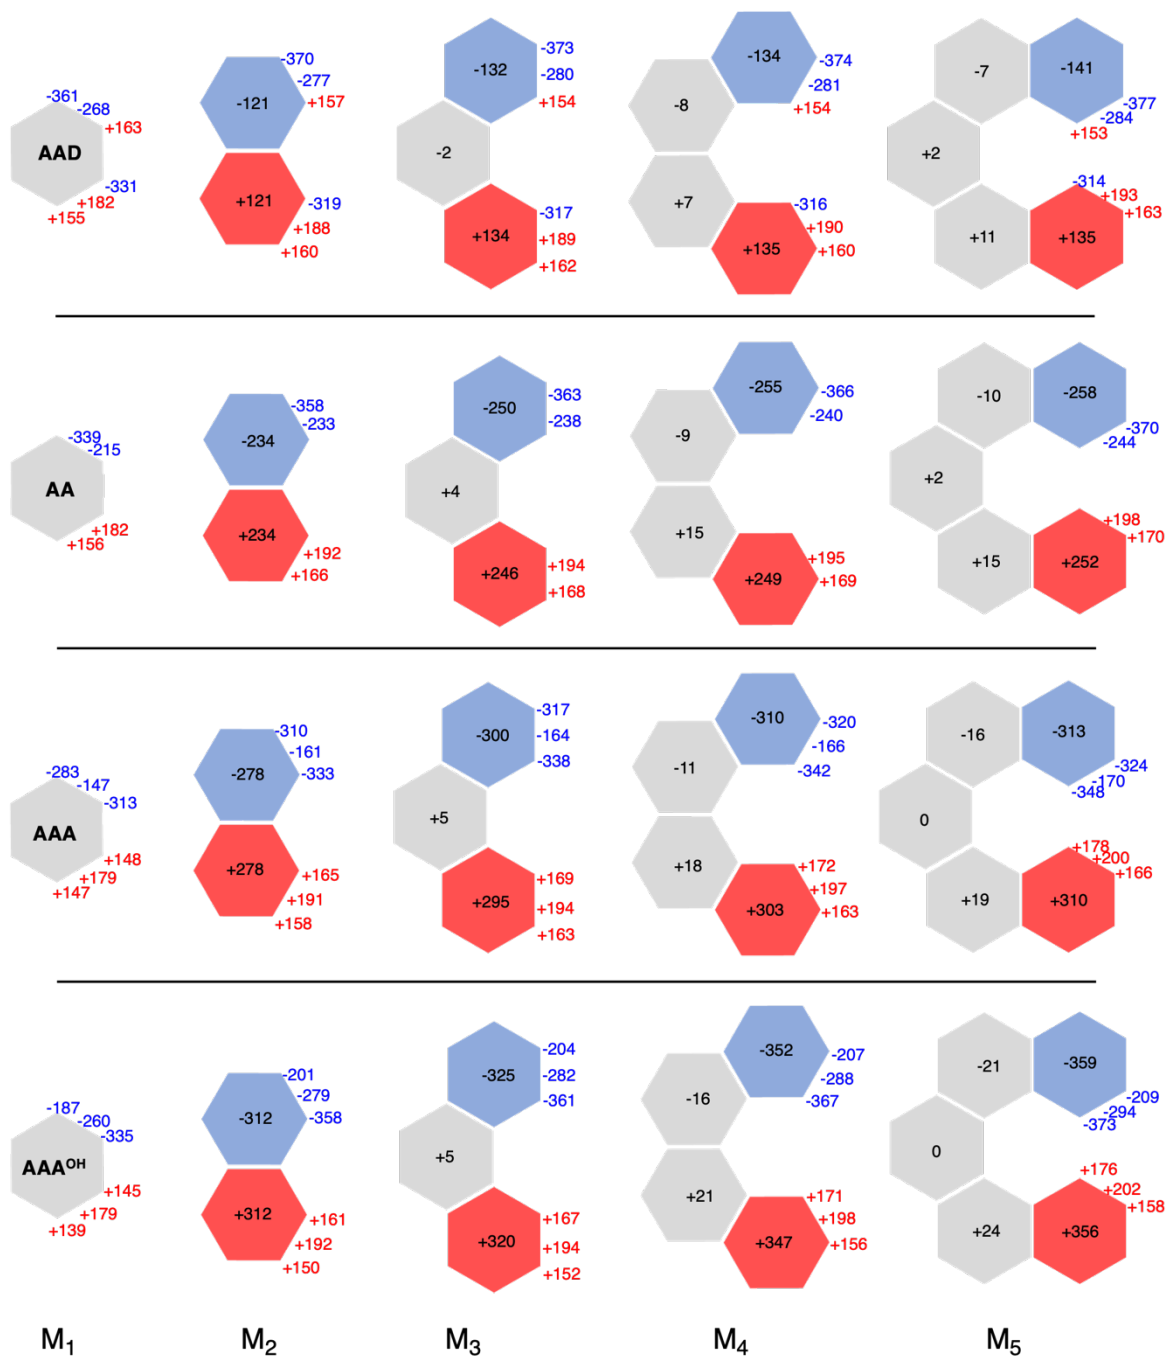

**Figure S4.** VDD charges (in milli-electrons) in the formation of AAD, AA, AAA and AAA<sup>OH</sup> cyclic structures. Values in black are whole charges of the monomer, whereas values in blue and red correspond to charges of hydrogen-bond acceptor and donor atoms, respectively.

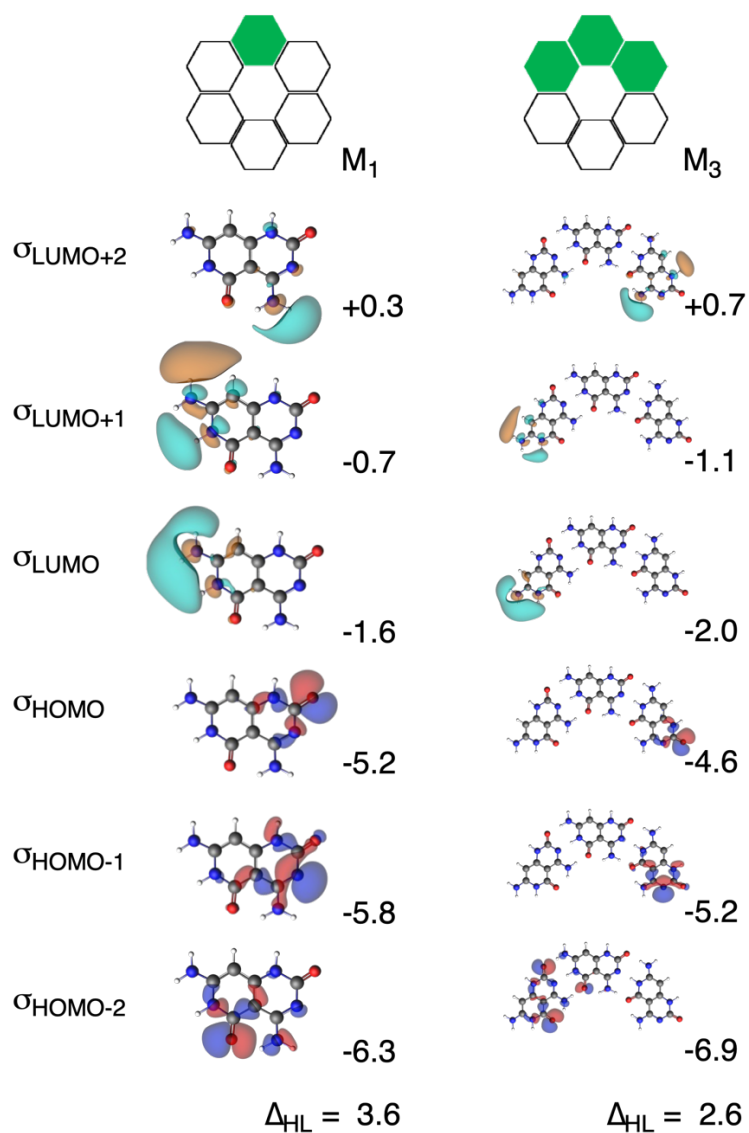

**Figure S5.** N-H unoccupied  $\sigma_{\text{LUMO}}$  orbitals and oxygen and nitrogen lone-pair  $\sigma_{\text{HOMO}}$  orbitals of the front atoms of AAD and their corresponding energies (in eV) for stepwise M<sub>1</sub> and M<sub>3</sub> states, computed at ZORA-BLYP-D3(BJ)/TZ2P level. HOMO LUMO gap ( $\Delta_{\text{HL}}$ , in eV) also included.



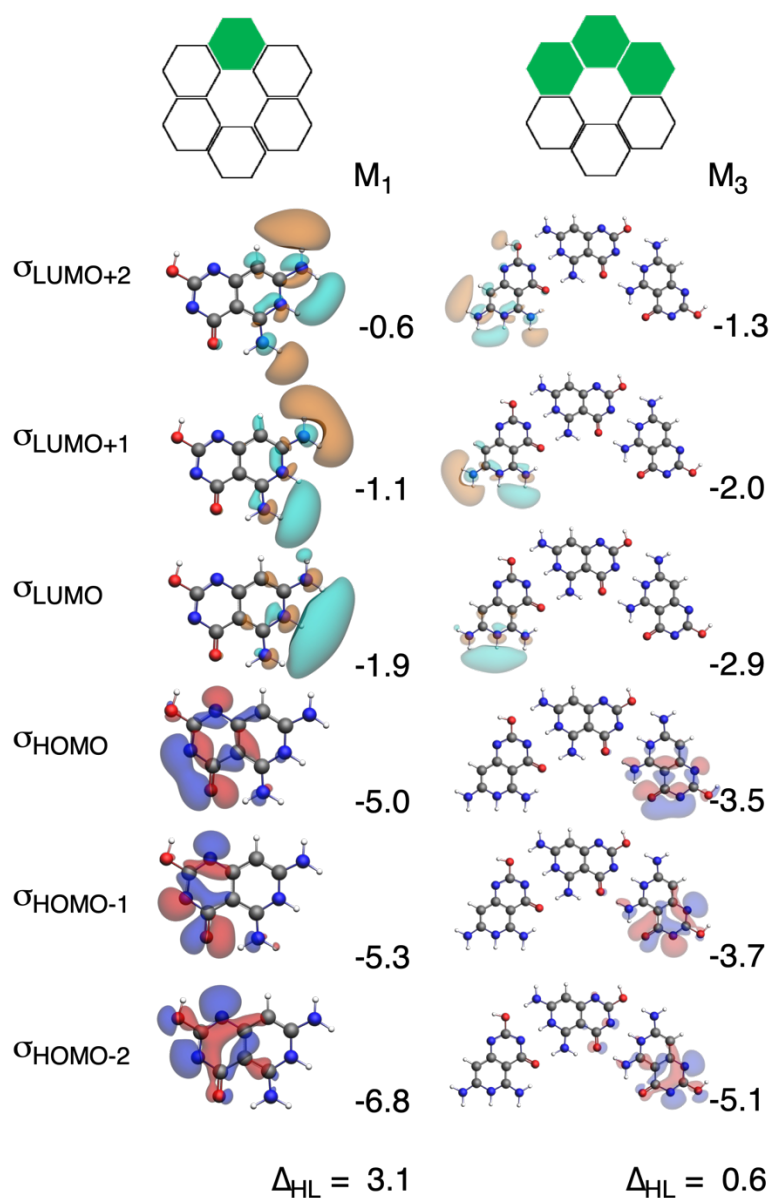

**Figure S6.** N-H unoccupied  $\sigma_{\text{LUMO}}$  orbitals and oxygen and nitrogen lone-pair  $\sigma_{\text{HOMO}}$  orbitals of the front atoms of  $\text{AAA}^{\text{OH}}$  and their corresponding energies (in eV) for stepwise M<sub>1</sub> and M<sub>3</sub> states, computed at ZORA-BLYP-D3(BJ)/TZ2P level. HOMO LUMO gap ( $\Delta_{\text{HL}}$ , in eV) also included.

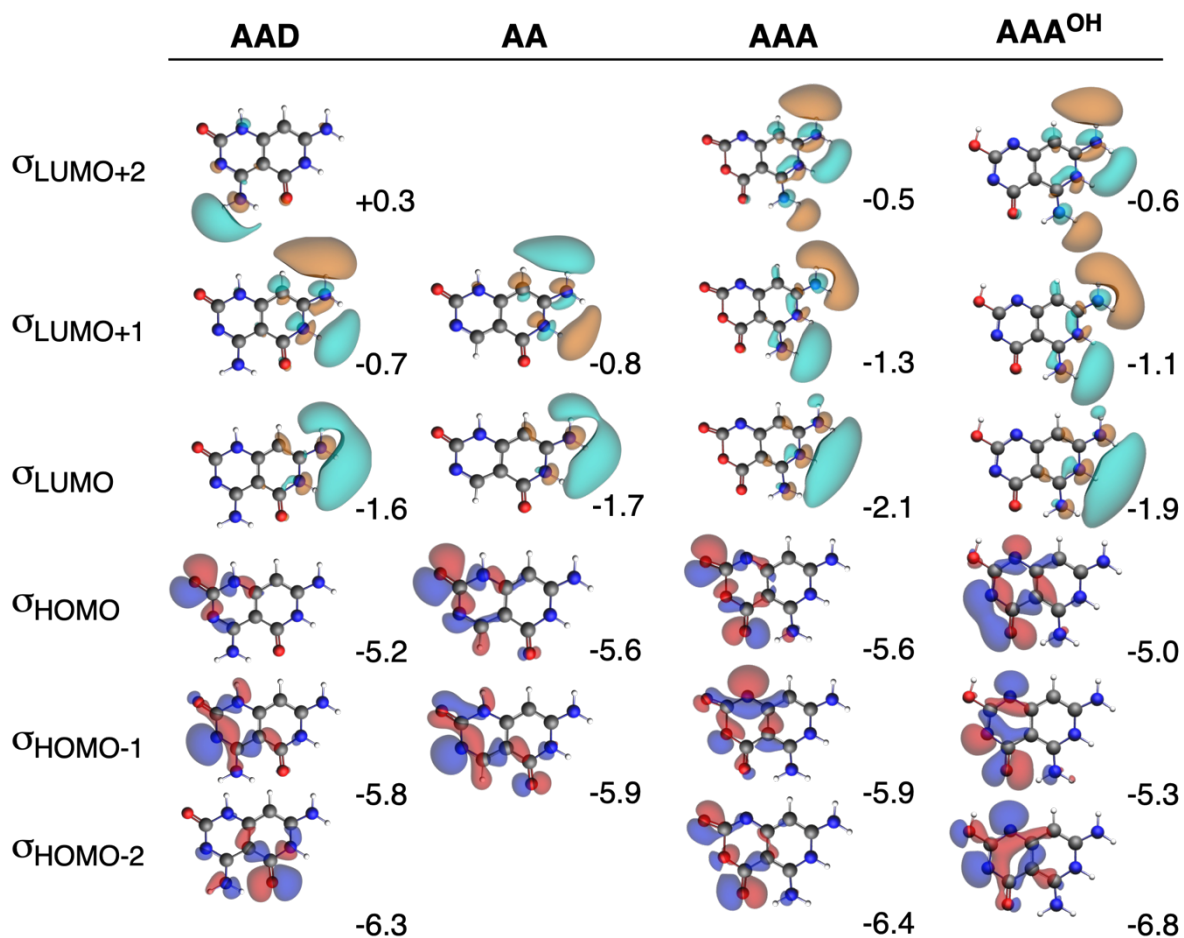

**Figure S7.** N-H unoccupied  $\sigma_{\text{LUMO}}$  orbitals and oxygen and nitrogen lone-pair  $\sigma_{\text{HOMO}}$  orbitals of the AAD, AA, AAA and AAA<sup>OH</sup> monomers (equilibrium geometries) and their corresponding energies (in eV).

**Table S2.** Cartesian coordinates (in Å) and total ADF electronic energies (in kcal mol<sup>-1</sup>) of all monomers optimized at ZORA-BLYP-D3(BJ)/TZ2P with restricted C<sub>s</sub> symmetry.

**AAD monomer**

**E (ZORA-BLYP-D3(BJ)/TZ2P): -3195.59**

|      |           |            |           |
|------|-----------|------------|-----------|
| 1 C  | -2.454168 | -8.412086  | 0.000000  |
| 2 N  | 2.419636  | -7.125619  | 0.000000  |
| 3 H  | -0.408487 | -4.566700  | -0.000000 |
| 4 O  | 1.367836  | -5.098198  | 0.000000  |
| 5 C  | -1.263726 | -6.382974  | 0.000000  |
| 6 N  | 3.657781  | -9.077517  | 0.000000  |
| 7 C  | 2.436966  | -8.496170  | 0.000000  |
| 8 H  | 1.226938  | -10.285825 | -0.000000 |
| 9 H  | 3.721420  | -10.085226 | -0.000000 |
| 10 H | 3.331324  | -6.594845  | 0.000000  |
| 11 H | -2.213714 | -4.559654  | 0.000000  |
| 12 O | -3.501556 | -9.093993  | -0.000000 |
| 13 C | 1.222115  | -9.200470  | 0.000000  |
| 14 N | -1.213150 | -9.098062  | 0.000000  |
| 15 N | -2.439968 | -7.056282  | -0.000000 |
| 16 C | 0.010626  | -7.063818  | 0.000000  |
| 17 H | -1.278202 | -10.111100 | 0.000000  |
| 18 N | -1.306548 | -5.050806  | 0.000000  |
| 19 C | 1.259001  | -6.353908  | 0.000000  |
| 20 H | 4.535309  | -8.525292  | 0.000000  |
| 21 C | 0.018731  | -8.476631  | 0.000000  |

**AA monomer**

**E (ZORA-BLYP-D3(BJ)/TZ2P): -2912.94**

|      |           |           |          |
|------|-----------|-----------|----------|
| 1 N  | 4.836674  | -5.612949 | 0.000000 |
| 2 O  | 4.983636  | -1.343331 | 0.000000 |
| 3 O  | 6.088086  | -7.553877 | 0.000000 |
| 4 H  | 3.888009  | -3.779473 | 0.000000 |
| 5 C  | 4.858291  | -4.277278 | 0.000000 |
| 6 C  | 7.279737  | -4.186005 | 0.000000 |
| 7 N  | 7.212620  | -5.565337 | 0.000000 |
| 8 H  | 9.444287  | -4.025279 | 0.000000 |
| 9 C  | 6.021239  | -6.309012 | 0.000000 |
| 10 N | 7.271060  | -1.433061 | 0.000000 |
| 11 C | 8.465123  | -2.092997 | 0.000000 |
| 12 H | 7.266475  | -0.376871 | 0.000000 |
| 13 H | 10.482777 | -1.800985 | 0.000000 |
| 14 C | 6.027590  | -3.508429 | 0.000000 |
| 15 H | 8.067263  | -6.115953 | 0.000000 |
| 16 C | 5.996511  | -2.042911 | 0.000000 |
| 17 N | 9.584178  | -1.339593 | 0.000000 |
| 18 C | 8.493145  | -3.502242 | 0.000000 |
| 19 H | 9.560912  | -0.302860 | 0.000000 |

**AAA monomer**

**E (ZORA-BLYP-D3(BJ)/TZ2P): -3058.14**

|      |           |           |          |
|------|-----------|-----------|----------|
| 1 N  | -3.701184 | -3.708097 | 0.000000 |
| 2 H  | -2.825987 | -4.258128 | 0.000000 |
| 3 N  | -6.038848 | -7.70016  | 0.000000 |
| 4 H  | -4.078805 | -6.174802 | 0.000000 |
| 5 O  | -9.596642 | -1.516165 | 0.000000 |
| 6 C  | -6.104044 | -2.114149 | 0.000000 |
| 7 C  | -4.905651 | -4.278540 | 0.000000 |
| 8 O  | -7.306611 | -1.483007 | 0.000000 |
| 9 C  | -8.650189 | -2.286728 | 0.000000 |
| 10 H | -3.701688 | -2.688751 | 0.000000 |
| 11 C | -6.158036 | -6.354580 | 0.000000 |
| 12 H | -6.877108 | -8.263635 | 0.000000 |
| 13 H | -8.305105 | -6.195416 | 0.000000 |
| 14 H | -5.126365 | -8.177909 | 0.000000 |
| 15 C | -7.363763 | -5.656913 | 0.000000 |
| 16 N | -4.965156 | -5.650636 | 0.000000 |
| 17 C | -7.377219 | -4.245866 | 0.000000 |
| 18 C | -6.122029 | -3.547442 | 0.000000 |
| 19 O | -5.073752 | -1.404277 | 0.000000 |
| 20 N | -8.574824 | -3.599648 | 0.000000 |

**AAA-OH monomer****E (ZORA-BLYP-D3(BJ)/TZ2P): -3173.11**

|      |           |          |          |
|------|-----------|----------|----------|
| 1 C  | 7.359614  | 5.634709 | 0.000000 |
| 2 H  | 2.825872  | 4.220124 | 0.000000 |
| 3 O  | 9.658463  | 1.549524 | 0.000000 |
| 4 H  | 8.300846  | 6.173913 | 0.000000 |
| 5 H  | 5.158664  | 8.162170 | 0.000000 |
| 6 O  | 5.088373  | 1.361333 | 0.000000 |
| 7 C  | 6.153429  | 6.319518 | 0.000000 |
| 8 C  | 6.149636  | 2.055805 | 0.000000 |
| 9 H  | 10.341815 | 2.249784 | 0.000000 |
| 10 H | 6.899236  | 8.224967 | 0.000000 |
| 11 C | 6.126573  | 3.510501 | 0.000000 |
| 12 H | 3.735494  | 2.645163 | 0.000000 |
| 13 H | 4.057636  | 6.161073 | 0.000000 |
| 14 C | 4.906110  | 4.247007 | 0.000000 |
| 15 N | 8.551961  | 3.546837 | 0.000000 |
| 16 N | 6.052963  | 7.675991 | 0.000000 |
| 17 C | 7.360967  | 4.222836 | 0.000000 |
| 18 N | 4.962409  | 5.622546 | 0.000000 |
| 19 C | 8.453105  | 2.224847 | 0.000000 |
| 20 N | 7.382844  | 1.428992 | 0.000000 |
| 21 N | 3.708294  | 3.668207 | 0.000000 |

**Table S3.** Cartesian coordinates (in Å) and total ADF electronic energies (in kcal mol<sup>-1</sup>) of all monomers optimized at ZORA-BLYP-D3(BJ)/TZ2P with C<sub>1</sub> symmetry, confirmed by frequency analysis.

**AAD monomer**

**E (ZORA-BLYP-D3(BJ)/TZ2P): -3200.07**

|      |           |            |           |
|------|-----------|------------|-----------|
| 1.C  | -2.458225 | -8.415793  | 0.006271  |
| 2.N  | 2.426024  | -7.127990  | 0.093722  |
| 3.H  | -0.454076 | -4.519313  | 0.130623  |
| 4.O  | 1.418050  | -5.077529  | 0.131860  |
| 5.C  | -1.284335 | -6.390468  | 0.074255  |
| 6.N  | 3.679855  | -9.103506  | -0.020420 |
| 7.C  | 2.438059  | -8.497780  | 0.050203  |
| 8.H  | 1.237345  | -10.271328 | 0.001224  |
| 9.H  | 3.689505  | -10.105445 | 0.133569  |
| 10.H | 3.294937  | -6.600992  | 0.054394  |
| 11.H | -2.238438 | -4.595594  | 0.114933  |
| 12.O | -3.458533 | -9.126648  | -0.020828 |
| 13.C | 1.243296  | -9.186611  | 0.022414  |
| 14.N | -1.173991 | -9.083299  | -0.006374 |
| 15.N | -2.439547 | -7.049649  | 0.046523  |
| 16.C | 0.018594  | -7.040455  | 0.068957  |
| 17.H | -1.226207 | -10.097247 | -0.039725 |
| 18.N | -1.329290 | -5.040151  | 0.111083  |
| 19.C | 1.258672  | -6.311739  | 0.101799  |
| 20.H | 4.457257  | -8.623133  | 0.421020  |
| 21.C | 0.029212  | -8.450503  | 0.024496  |

**AA monomer**

**E (ZORA-BLYP-D3(BJ)/TZ2P): -2916.55**

|      |           |            |           |
|------|-----------|------------|-----------|
| 1.C  | 2.422676  | -8.388224  | 0.058738  |
| 2.H  | -1.321135 | -5.255931  | 0.009803  |
| 3.C  | -0.018734 | -6.973620  | 0.024684  |
| 4.N  | 2.392743  | -7.018621  | 0.068389  |
| 5.H  | -1.238266 | -10.033689 | -0.015117 |
| 6.N  | 3.666607  | -8.981479  | 0.016083  |
| 7.O  | 1.337213  | -4.981790  | 0.044651  |
| 8.H  | 1.253445  | -10.188507 | 0.041797  |
| 9.H  | 3.698725  | -9.977819  | 0.197130  |
| 10.C | 1.210910  | -6.205247  | 0.046297  |
| 11.C | 0.019225  | -8.385151  | 0.016586  |
| 12.H | 3.257329  | -6.483856  | 0.030752  |
| 13.O | -3.476425 | -9.056961  | -0.038724 |
| 14.N | -2.456035 | -6.968793  | -0.014718 |
| 15.C | 1.237389  | -9.103628  | 0.039579  |
| 16.N | -1.190062 | -9.017750  | -0.006910 |
| 17.C | -1.297590 | -6.347382  | 0.005863  |
| 18.H | 4.453592  | -8.467485  | 0.396487  |
| 19.C | -2.469641 | -8.362686  | -0.021371 |

**AAA monomer**

**E (ZORA-BLYP-D3(BJ)/TZ2P): -3063.11**

|      |            |          |           |
|------|------------|----------|-----------|
| 1.C  | -6.131201  | 3.501209 | 0.035522  |
| 2.C  | -4.861524  | 4.224220 | 0.058541  |
| 3.N  | -5.032199  | 1.347616 | 0.044517  |
| 4.H  | -10.585794 | 1.832391 | 0.035035  |
| 5.N  | -9.707077  | 1.323892 | 0.007522  |
| 6.H  | -5.049354  | 0.378318 | 0.333974  |
| 7.H  | -9.526938  | 4.061592 | 0.045007  |
| 8.N  | -7.416651  | 5.577704 | -0.023889 |
| 9.N  | -7.373949  | 1.455694 | 0.095772  |
| 10.C | -8.584487  | 2.146785 | 0.065487  |
| 11.H | -4.165864  | 1.904568 | 0.108661  |
| 12.C | -8.592267  | 3.510594 | 0.033190  |
| 13.H | -7.395402  | 0.462097 | -0.111713 |
| 14.H | -9.711279  | 0.539317 | 0.656195  |
| 15.O | -4.951385  | 5.575556 | 0.037127  |
| 16.O | -3.748207  | 3.685530 | 0.098808  |
| 17.O | -6.150728  | 7.507529 | -0.066374 |
| 18.C | -7.359445  | 4.249493 | 0.002909  |
| 19.C | -6.153939  | 2.104073 | 0.069377  |
| 20.C | -6.272254  | 6.310649 | -0.025666 |

**AAA-OH monomer****E (ZORA-BLYP-D3(BJ)/TZ2P): -3178.52**

|      |            |          |           |
|------|------------|----------|-----------|
| 1.N  | -7.362997  | 1.481227 | 0.092122  |
| 2.H  | -7.384034  | 0.478551 | -0.066850 |
| 3.C  | -4.846961  | 4.278457 | 0.061005  |
| 4.C  | -6.131911  | 6.187187 | -0.004732 |
| 5.O  | -6.165029  | 7.548752 | -0.036061 |
| 6.C  | -6.142524  | 2.129606 | 0.081768  |
| 7.H  | -7.114755  | 7.782358 | -0.061990 |
| 8.N  | -9.698015  | 1.335102 | -0.001229 |
| 9.N  | -7.362788  | 5.601478 | -0.017583 |
| 10.H | -4.987221  | 0.415882 | 0.239101  |
| 11.H | -10.574743 | 1.848195 | 0.011513  |
| 12.C | -8.586944  | 3.530590 | 0.032701  |
| 13.H | -4.159880  | 2.042000 | 0.113940  |
| 14.H | -9.524082  | 4.077763 | 0.041797  |
| 15.N | -4.927190  | 5.648795 | 0.035239  |
| 16.O | -3.738411  | 3.678140 | 0.095093  |
| 17.C | -7.349305  | 4.259505 | 0.010319  |
| 18.C | -6.121846  | 3.532832 | 0.048701  |
| 19.H | -9.712153  | 0.577348 | 0.679478  |
| 20.C | -8.575606  | 2.165962 | 0.062013  |
| 21.N | -5.004316  | 1.414768 | 0.083652  |

**Table S4.** Cartesian coordinates (in Å) and total ADF electronic energies (in kcal mol<sup>-1</sup>) of all dimers optimized at ZORA-BLYP-D3(BJ)/TZ2P with restricted C<sub>s</sub> symmetry.

**[AAD]<sub>2</sub>**  
**E (ZORA-BLYP-D3(BJ)/TZ2P): -6429.35**

|      |           |            |          |
|------|-----------|------------|----------|
| 1 C  | -2.466459 | -8.499681  | 0.000000 |
| 2 O  | 5.187356  | -1.252838  | 0.000000 |
| 3 H  | -0.554055 | -4.557614  | 0.000000 |
| 4 O  | 1.315493  | -5.070398  | 0.000000 |
| 5 C  | -1.335322 | -6.449700  | 0.000000 |
| 6 C  | 7.334876  | -4.196188  | 0.000000 |
| 7 H  | 9.514790  | -4.128506  | 0.000000 |
| 8 H  | 1.263603  | -10.271413 | 0.000000 |
| 9 H  | 3.736493  | -10.036405 | 0.000000 |
| 10 H | 3.277466  | -6.552702  | 0.000000 |
| 11 H | -2.337906 | -4.679817  | 0.000000 |
| 12 N | 7.461701  | -1.465540  | 0.000000 |
| 13 H | 10.688223 | -1.924662  | 0.000000 |
| 14 H | 9.800925  | -0.440291  | 0.000000 |
| 15 H | 8.092019  | -6.132794  | 0.000000 |
| 16 C | -0.020591 | -7.067847  | 0.000000 |
| 17 C | 6.124267  | -3.473301  | 0.000000 |
| 18 C | 8.594315  | -3.554541  | 0.000000 |
| 19 H | 2.823784  | -4.138504  | 0.000000 |
| 20 N | 4.873058  | -5.579699  | 0.000000 |
| 21 C | 0.021751  | -8.484909  | 0.000000 |
| 22 N | 2.385144  | -7.091378  | 0.000000 |
| 23 N | 3.664741  | -9.029656  | 0.000000 |
| 24 C | 2.432652  | -8.463419  | 0.000000 |
| 25 N | 9.797605  | -1.449779  | 0.000000 |
| 26 O | 6.101036  | -7.528007  | 0.000000 |
| 27 H | 3.727587  | -2.576656  | 0.000000 |
| 28 C | 8.636566  | -2.169721  | 0.000000 |
| 29 C | 6.153063  | -2.032432  | 0.000000 |
| 30 H | 7.462071  | -0.448355  | 0.000000 |
| 31 C | 4.882049  | -4.228825  | 0.000000 |
| 32 H | 4.532347  | -8.473167  | 0.000000 |
| 33 O | -3.458164 | -9.227749  | 0.000000 |
| 34 C | 1.241544  | -9.186252  | 0.000000 |
| 35 N | 7.252121  | -5.562056  | 0.000000 |
| 36 N | -2.478809 | -7.131564  | 0.000000 |
| 37 C | 6.028854  | -6.285701  | 0.000000 |
| 38 N | -1.416692 | -5.097761  | 0.000000 |
| 39 C | 1.209144  | -6.332610  | 0.000000 |
| 40 N | 3.709033  | -3.595327  | 0.000000 |
| 41 H | -1.208045 | -10.153930 | 0.000000 |
| 42 N | -1.176495 | -9.138972  | 0.000000 |

**[AA]<sub>2</sub>**  
**E (ZORA-BLYP-D3(BJ)/TZ2P): -5854.06**

|      |           |            |          |
|------|-----------|------------|----------|
| 1.C  | 2.399430  | -8.457711  | 0.000000 |
| 2.O  | 4.928527  | -1.382927  | 0.000000 |
| 3.O  | 6.210396  | -7.564515  | 0.000000 |
| 4.H  | 3.877692  | -3.884418  | 0.000000 |
| 5.H  | -1.331155 | -9.976479  | 0.000000 |
| 6.C  | 7.289867  | -4.166846  | 0.000000 |
| 7.O  | 1.436539  | -5.022094  | 0.000000 |
| 8.H  | 1.160574  | -10.225281 | 0.000000 |
| 9.H  | 3.648335  | -10.086151 | 0.000000 |
| 10.N | 7.220693  | -1.427634  | 0.000000 |
| 11.C | 8.437334  | -2.054126  | 0.000000 |
| 12.H | 3.324180  | -6.590677  | 0.000000 |
| 13.H | 10.467785 | -1.682782  | 0.000000 |
| 14.C | 6.024604  | -3.528929  | 0.000000 |
| 15.H | 8.152188  | -6.058917  | 0.000000 |
| 16.N | -1.243009 | -8.963648  | 0.000000 |
| 17.C | -1.241199 | -6.295351  | 0.000000 |
| 18.C | 8.497088  | -3.444539  | 0.000000 |
| 19.H | 9.488512  | -0.257024  | 0.000000 |
| 20.N | 4.898019  | -5.665264  | 0.000000 |
| 21.C | 4.868578  | -4.343168  | 0.000000 |
| 22.N | 2.413661  | -7.090925  | 0.000000 |
| 23.N | 3.610704  | -9.077737  | 0.000000 |
| 24.C | 1.274235  | -6.250972  | 0.000000 |

|      |           |           |          |
|------|-----------|-----------|----------|
| 25.C | -0.002898 | -8.381338 | 0.000000 |
| 26.C | 5.938463  | -2.075483 | 0.000000 |
| 27.N | 9.548354  | -1.265282 | 0.000000 |
| 28.C | 1.181254  | -9.140042 | 0.000000 |
| 29.H | 4.491606  | -8.557022 | 0.000000 |
| 30.C | -2.491768 | -8.260991 | 0.000000 |
| 31.H | 7.159654  | -0.411807 | 0.000000 |
| 32.C | 0.009349  | -6.964252 | 0.000000 |
| 33.O | -3.528053 | -8.918364 | 0.000000 |
| 34.C | 6.105941  | -6.333628 | 0.000000 |
| 35.N | 7.277762  | -5.539100 | 0.000000 |
| 36.N | -2.428592 | -6.870635 | 0.000000 |
| 37.H | 9.458375  | -3.947344 | 0.000000 |
| 38.H | -1.223446 | -5.203659 | 0.000000 |

**[AAA]<sub>2</sub>**

**E (ZORA-BLYP-D3(BJ)/TZ2P): -6148.37**

|      |            |           |          |
|------|------------|-----------|----------|
| 1.N  | -3.661375  | -3.846608 | 0.000000 |
| 2.H  | -2.811862  | -4.394118 | 0.000000 |
| 3.N  | -6.135058  | -7.809628 | 0.000000 |
| 4.H  | -4.129414  | -6.317585 | 0.000000 |
| 5.O  | -9.497190  | -1.552963 | 0.000000 |
| 6.H  | -5.019603  | 0.476475  | 0.000000 |
| 7.H  | -9.556308  | 4.112939  | 0.000000 |
| 8.O  | -7.213789  | -1.553448 | 0.000000 |
| 9.N  | -7.352143  | 1.550148  | 0.000000 |
| 10.C | -8.577020  | 2.209121  | 0.000000 |
| 11.C | -6.206539  | -6.445873 | 0.000000 |
| 12.C | -8.608213  | 3.585263  | 0.000000 |
| 13.H | -7.339632  | 0.531026  | 0.000000 |
| 14.H | -9.613533  | 0.384898  | 0.000000 |
| 15.C | -7.376287  | -5.725007 | 0.000000 |
| 16.O | -3.771650  | 3.863041  | 0.000000 |
| 17.C | -7.350017  | -4.301505 | 0.000000 |
| 18.C | -7.400095  | 4.344056  | 0.000000 |
| 19.O | -4.976597  | -1.518198 | 0.000000 |
| 20.N | -8.518519  | -3.644674 | 0.000000 |
| 21.C | -6.152956  | 3.626966  | 0.000000 |
| 22.C | -4.903341  | 4.373335  | 0.000000 |
| 23.C | -8.554157  | -2.310920 | 0.000000 |
| 24.H | -3.641831  | -2.820171 | 0.000000 |
| 25.N | -9.676638  | 1.401085  | 0.000000 |
| 26.N | -7.482147  | 5.680994  | 0.000000 |
| 27.H | -4.158647  | 2.057985  | 0.000000 |
| 28.N | -4.986493  | -5.774468 | 0.000000 |
| 29.C | -6.071160  | -3.642605 | 0.000000 |
| 30.C | -6.018352  | -2.192536 | 0.000000 |
| 31.C | -6.361271  | 6.433513  | 0.000000 |
| 32.H | -6.987028  | -8.351966 | 0.000000 |
| 33.H | -10.590771 | 1.827607  | 0.000000 |
| 34.H | -5.259981  | -8.312818 | 0.000000 |
| 35.C | -4.888516  | -4.398352 | 0.000000 |
| 36.C | -6.148244  | 2.223280  | 0.000000 |
| 37.H | -8.335924  | -6.230315 | 0.000000 |
| 38.O | -5.018027  | 5.725241  | 0.000000 |
| 39.O | -6.255545  | 7.637555  | 0.000000 |
| 40.N | -5.017076  | 1.493200  | 0.000000 |

**[AAA-OH]<sub>2</sub>**

**E (ZORA-BLYP-D3(BJ)/TZ2P): -6381.04**

|      |            |           |          |
|------|------------|-----------|----------|
| 1.N  | -7.344761  | 1.557625  | 0.000000 |
| 2.H  | -7.350845  | 0.527008  | 0.000000 |
| 3.C  | -4.839464  | 4.375931  | 0.000000 |
| 4.H  | -4.107437  | -6.199252 | 0.000000 |
| 5.O  | -9.657549  | -1.638372 | 0.000000 |
| 6.C  | -6.130027  | 2.214593  | 0.000000 |
| 7.H  | -3.818580  | -2.655331 | 0.000000 |
| 8.N  | -4.984204  | -5.687744 | 0.000000 |
| 9.C  | -8.462861  | -2.299839 | 0.000000 |
| 10.H | -6.881569  | -8.344024 | 0.000000 |
| 11.H | -10.580965 | 1.890365  | 0.000000 |
| 12.C | -8.569220  | 3.612382  | 0.000000 |
| 13.N | -6.052361  | -7.768449 | 0.000000 |
| 14.H | -9.510357  | 4.153220  | 0.000000 |
| 15.N | -4.927464  | 5.750827  | 0.000000 |
| 16.O | -3.721793  | 3.789972  | 0.000000 |



|      |            |           |          |
|------|------------|-----------|----------|
| 17.C | -7.382208  | -4.303573 | 0.000000 |
| 18.C | -6.176990  | -6.405184 | 0.000000 |
| 19.0 | -5.096808  | -1.449955 | 0.000000 |
| 20.C | -8.552231  | 2.236936  | 0.000000 |
| 21.H | -10.349380 | -2.330540 | 0.000000 |
| 22.C | -6.138288  | 6.278242  | 0.000000 |
| 23.C | -7.372477  | -5.727688 | 0.000000 |
| 24.H | -7.134559  | 7.863125  | 0.000000 |
| 25.N | -9.675636  | 1.447339  | 0.000000 |
| 26.N | -7.360882  | 5.692742  | 0.000000 |
| 27.H | -5.013479  | 0.469086  | 0.000000 |
| 28.H | -4.154551  | 2.089215  | 0.000000 |
| 29.C | -6.144165  | -3.592232 | 0.000000 |
| 30.C | -6.163551  | -2.124525 | 0.000000 |
| 31.H | -9.630872  | 0.436644  | 0.000000 |
| 32.H | -2.860348  | -4.186382 | 0.000000 |
| 33.N | -8.559913  | -3.640339 | 0.000000 |
| 34.H | -5.157831  | -8.235467 | 0.000000 |
| 35.C | -6.108435  | 3.624095  | 0.000000 |
| 36.H | -8.313192  | -6.267584 | 0.000000 |
| 37.N | -3.742001  | -3.691892 | 0.000000 |
| 38.C | -4.933946  | -4.307933 | 0.000000 |
| 39.N | -5.003371  | 1.488797  | 0.000000 |
| 40.0 | -6.180007  | 7.649589  | 0.000000 |
| 41.N | -7.393830  | -1.510916 | 0.000000 |
| 42.C | -7.341915  | 4.341135  | 0.000000 |

**Table S5.** Cartesian coordinates (in Å) and total ADF electronic energies (in kcal mol<sup>-1</sup>) of all dimers optimized at ZORA-BLYP-D3(BJ)/TZ2P with C<sub>1</sub> symmetry, confirmed by frequency analysis.

**[AAD]<sub>2</sub>**  
**E (ZORA-BLYP-D3(BJ)/TZ2P): -6429.65**

|      |           |            |           |
|------|-----------|------------|-----------|
| 1.C  | -2.465486 | -8.498145  | 0.006287  |
| 2.O  | 5.185055  | -1.251779  | -0.005581 |
| 3.H  | -0.551504 | -4.556745  | -0.003382 |
| 4.O  | 1.318381  | -5.070732  | -0.004970 |
| 5.C  | -1.333442 | -6.448645  | 0.001237  |
| 6.C  | 7.334147  | -4.193475  | 0.000662  |
| 7.H  | 9.515330  | -4.122013  | 0.021441  |
| 8.H  | 1.263683  | -10.271794 | 0.002685  |
| 9.H  | 3.737004  | -10.038041 | -0.000468 |
| 10.H | 3.278845  | -6.554130  | -0.004528 |
| 11.H | -2.335258 | -4.678349  | -0.000461 |
| 12.N | 7.460276  | -1.462131  | 0.011080  |
| 13.H | 10.660179 | -1.938587  | 0.140156  |
| 14.H | 9.789749  | -0.488866  | 0.320629  |
| 15.H | 8.094687  | -6.128435  | -0.003095 |
| 16.C | -0.018896 | -7.067459  | 0.000092  |
| 17.C | 6.124788  | -3.470908  | 0.000281  |
| 18.C | 8.594316  | -3.548862  | 0.011971  |
| 19.H | 2.824203  | -4.138697  | -0.008666 |
| 20.N | 4.874931  | -5.578144  | -0.003885 |
| 21.C | 0.022739  | -8.484583  | 0.002070  |
| 22.N | 2.386688  | -7.092421  | -0.003263 |
| 23.N | 3.665567  | -9.031275  | -0.002424 |
| 24.C | 2.433611  | -8.464487  | -0.001406 |
| 25.N | 9.800391  | -1.435197  | -0.043384 |
| 26.O | 6.103763  | -7.525900  | -0.001588 |
| 27.H | 3.727472  | -2.575975  | -0.009673 |
| 28.C | 8.634207  | -2.166761  | 0.010988  |
| 29.C | 6.152488  | -2.028742  | 0.002256  |
| 30.H | 7.464614  | -0.445934  | -0.037633 |
| 31.C | 4.882382  | -4.227532  | -0.004733 |
| 32.H | 4.533074  | -8.475189  | -0.002759 |
| 33.O | -3.457425 | -9.225730  | 0.009292  |
| 34.C | 1.242233  | -9.186628  | 0.001223  |
| 35.N | 7.253890  | -5.558923  | -0.001750 |
| 36.N | -2.477138 | -7.130002  | 0.004165  |
| 37.C | 6.030851  | -6.284006  | -0.002262 |
| 38.N | -1.414208 | -5.096690  | -0.000664 |
| 39.C | 1.211120  | -6.332951  | -0.002824 |
| 40.N | 3.709341  | -3.594739  | -0.008500 |
| 41.H | -1.207793 | -10.153016 | 0.006466  |
| 42.N | -1.175706 | -9.138066  | 0.004917  |

**[AA]<sub>2</sub>**  
**E (ZORA-BLYP-D3(BJ)/TZ2P): -5854.06**

|      |           |            |           |
|------|-----------|------------|-----------|
| 1.C  | 2.400961  | -8.460169  | -0.054128 |
| 2.O  | 4.932062  | -1.385441  | -0.158862 |
| 3.O  | 6.209403  | -7.564332  | 0.046652  |
| 4.H  | 3.881743  | -3.887058  | -0.161457 |
| 5.H  | -1.328669 | -9.971497  | 0.106254  |
| 6.C  | 7.287325  | -4.166566  | 0.044628  |
| 7.O  | 1.443439  | -5.023227  | -0.081074 |
| 8.H  | 1.160899  | -10.224860 | 0.021716  |
| 9.H  | 3.647709  | -10.085331 | 0.013509  |
| 10.N | 7.219238  | -1.427687  | 0.000166  |
| 11.C | 8.432717  | -2.053665  | 0.083916  |
| 12.H | 3.327623  | -6.594824  | -0.105031 |
| 13.H | 10.435483 | -1.688826  | 0.319348  |
| 14.C | 6.025516  | -3.529599  | -0.042936 |
| 15.H | 8.148940  | -6.056771  | 0.130327  |
| 16.N | -1.239507 | -8.958996  | 0.083717  |
| 17.C | -1.234824 | -6.291109  | 0.030681  |
| 18.C | 8.492788  | -3.441968  | 0.112144  |
| 19.H | 9.462684  | -0.281362  | 0.346766  |
| 20.N | 4.900604  | -5.666501  | -0.075727 |
| 21.C | 4.871011  | -4.344985  | -0.098832 |
| 22.N | 2.416899  | -7.093863  | -0.082653 |
| 23.N | 3.611361  | -9.083392  | -0.105510 |
| 24.C | 1.279341  | -6.251600  | -0.056839 |

|      |           |           |           |
|------|-----------|-----------|-----------|
| 25.C | 0.000328  | -8.378947 | 0.028286  |
| 26.C | 5.939856  | -2.075915 | -0.075380 |
| 27.N | 9.547992  | -1.258092 | 0.092895  |
| 28.C | 1.183136  | -9.139811 | 0.003129  |
| 29.H | 4.489507  | -8.561409 | -0.042134 |
| 30.C | -2.486701 | -8.254236 | 0.114022  |
| 31.H | 7.163180  | -0.413071 | -0.057034 |
| 32.C | 0.014312  | -6.962342 | -0.000714 |
| 33.O | -3.523088 | -8.909431 | 0.163378  |
| 34.C | 6.106058  | -6.334144 | 0.012436  |
| 35.N | 7.275959  | -5.538253 | 0.067213  |
| 36.N | -2.421891 | -6.864148 | 0.084654  |
| 37.H | 9.451858  | -3.943970 | 0.183811  |
| 38.H | -1.215673 | -5.199661 | 0.008661  |

**[AAA]<sub>2</sub>**

**E (ZORA-BLYP-D3(BJ)/TZ2P): -6149.27**

|      |            |           |           |
|------|------------|-----------|-----------|
| 1.N  | -3.688860  | -3.860107 | -0.434097 |
| 2.H  | -2.833040  | -4.394145 | -0.366612 |
| 3.N  | -6.090451  | -7.768788 | 0.438129  |
| 4.H  | -4.163976  | -6.320207 | -0.135070 |
| 5.O  | -9.482257  | -1.515767 | 0.101888  |
| 6.H  | -5.022481  | 0.455939  | -0.216260 |
| 7.H  | -9.547180  | 4.097501  | -0.140594 |
| 8.O  | -7.223814  | -1.544805 | -0.226710 |
| 9.N  | -7.350836  | 1.531856  | -0.221768 |
| 10.C | -8.568865  | 2.199198  | -0.269784 |
| 11.C | -6.185571  | -6.395848 | 0.318292  |
| 12.C | -8.603460  | 3.562997  | -0.107986 |
| 13.H | -7.341225  | 0.517059  | -0.317223 |
| 14.H | -9.620231  | 0.414927  | -0.290755 |
| 15.C | -7.347163  | -5.673163 | 0.379069  |
| 16.O | -3.788065  | 3.793228  | 0.375002  |
| 17.C | -7.336324  | -4.261990 | 0.158647  |
| 18.C | -7.400378  | 4.305934  | 0.098579  |
| 19.O | -5.008198  | -1.529538 | -0.535463 |
| 20.N | -8.497671  | -3.601013 | 0.237559  |
| 21.C | -6.159745  | 3.580039  | 0.138385  |
| 22.C | -4.915198  | 4.310409  | 0.333608  |
| 23.C | -8.543059  | -2.276142 | 0.065469  |
| 24.H | -3.674577  | -2.840892 | -0.554674 |
| 25.N | -9.659943  | 1.404633  | -0.538767 |
| 26.N | -7.484826  | 5.633480  | 0.246083  |
| 27.H | -4.172783  | 2.000741  | 0.130996  |
| 28.N | -4.981118  | -5.747766 | 0.053798  |
| 29.C | -6.074930  | -3.626769 | -0.109115 |
| 30.C | -6.033208  | -2.189536 | -0.306943 |
| 31.C | -6.369319  | 6.369988  | 0.442966  |
| 32.H | -6.949205  | -8.236671 | 0.708591  |
| 33.H | -10.562172 | 1.840884  | -0.394870 |
| 34.H | -5.273514  | -8.142601 | 0.913040  |
| 35.C | -4.896161  | -4.389328 | -0.163581 |
| 36.C | -6.154304  | 2.185321  | -0.021225 |
| 37.H | -8.289932  | -6.157283 | 0.609822  |
| 38.O | -5.031505  | 5.654749  | 0.476353  |
| 39.O | -6.267623  | 7.563527  | 0.601016  |
| 40.N | -5.029785  | 1.443920  | 0.024205  |

**[AAA-OH]<sub>2</sub>**

**E (ZORA-BLYP-D3(BJ)/TZ2P): -6382.59**

|      |           |           |           |
|------|-----------|-----------|-----------|
| 1.N  | -0.692359 | 2.026960  | -0.186466 |
| 2.H  | -0.699157 | 0.995057  | -0.205396 |
| 3.C  | 1.760112  | 4.829315  | 0.398015  |
| 4.H  | 2.477532  | -5.722252 | -0.282355 |
| 5.O  | -2.960556 | -1.072965 | 0.332304  |
| 6.C  | 0.498135  | 2.674869  | 0.067158  |
| 7.H  | 2.800270  | -2.177940 | -0.517302 |
| 8.N  | 1.647413  | -5.180508 | -0.060613 |
| 9.C  | -1.785556 | -1.752096 | 0.193106  |
| 10.H | -0.243786 | -7.751087 | 0.487931  |
| 11.H | -3.872288 | 2.383227  | -0.576295 |
| 12.C | -1.912368 | 4.078472  | -0.276325 |
| 13.N | 0.603397  | -7.253942 | 0.232179  |
| 14.H | -2.842032 | 4.622591  | -0.410619 |
| 15.N | 1.664300  | 6.202494  | 0.457980  |
| 16.O | 2.865563  | 4.240765  | 0.546674  |

|      |           |           |           |
|------|-----------|-----------|-----------|
| 17.C | -0.720462 | -3.763092 | 0.187688  |
| 18.C | 0.468014  | -5.873579 | 0.198253  |
| 19.O | 1.539512  | -0.953468 | -0.409855 |
| 20.C | -1.883803 | 2.708915  | -0.358478 |
| 21.H | -3.646546 | -1.750324 | 0.501108  |
| 22.C | 0.467410  | 6.733477  | 0.287998  |
| 23.C | -0.707759 | -5.184769 | 0.330592  |
| 24.H | -0.525027 | 8.319367  | 0.212827  |
| 25.N | -2.979481 | 1.913323  | -0.674418 |
| 26.N | -0.734479 | 6.152062  | 0.048254  |
| 27.H | 1.627598  | 0.944620  | 0.019160  |
| 28.H | 2.448225  | 2.538239  | 0.374832  |
| 29.C | 0.503290  | -3.076672 | -0.068472 |
| 30.C | 0.487245  | -1.613906 | -0.188833 |
| 31.H | -2.984537 | 0.968257  | -0.297929 |
| 32.H | 3.750675  | -3.712752 | -0.491478 |
| 33.N | -1.881975 | -3.088202 | 0.321445  |
| 34.H | 1.419691  | -7.620028 | 0.716006  |
| 35.C | 0.511641  | 4.082295  | 0.151413  |
| 36.H | -1.632509 | -5.704640 | 0.556994  |
| 37.N | 2.873027  | -3.212464 | -0.450655 |
| 38.C | 1.699525  | -3.809171 | -0.194714 |
| 39.N | 1.609067  | 1.940865  | 0.236399  |
| 40.O | 0.416975  | 8.101772  | 0.361367  |
| 41.N | -0.727783 | -0.986718 | -0.046780 |
| 42.C | -0.706155 | 4.803629  | -0.022698 |

**Table S6.** Cartesian coordinates (in Å) and total ADF electronic energies (in kcal mol<sup>-1</sup>) of all rosettes optimized at ZORA-BLYP-D3(BJ)/TZ2P with restricted C<sub>s</sub> symmetry.

**AAD rosette**

**E (ZORA-BLYP-D3(BJ)/TZ2P): -19391.85**

|      |           |            |          |
|------|-----------|------------|----------|
| 1.H  | -9.395109 | -3.948772  | 0.000000 |
| 2.O  | 5.098834  | -1.364267  | 0.000000 |
| 3.H  | -0.408487 | -4.566700  | 0.000000 |
| 4.H  | -4.045173 | -6.182429  | 0.000000 |
| 5.O  | -9.626188 | -1.514820  | 0.000000 |
| 6.C  | 7.350215  | -4.221777  | 0.000000 |
| 7.C  | 6.138926  | 6.358612   | 0.000000 |
| 8.H  | 1.226938  | -10.285825 | 0.000000 |
| 9.H  | 3.721420  | -10.085226 | 0.000000 |
| 10.C | -2.436966 | 8.496170   | 0.000000 |
| 11.C | 6.111728  | 3.541074   | 0.000000 |
| 12.C | -8.578689 | 3.541404   | 0.000000 |
| 13.H | 10.594543 | -1.819356  | 0.000000 |
| 14.N | -3.657781 | 9.077517   | 0.000000 |
| 15.H | 8.117334  | -6.162095  | 0.000000 |
| 16.N | -3.720811 | 3.656711   | 0.000000 |
| 17.C | -7.331148 | -4.254567  | 0.000000 |
| 18.C | 8.578689  | -3.541404  | 0.000000 |
| 19.H | 2.841941  | -4.196791  | 0.000000 |
| 20.N | 4.890922  | -5.641029  | 0.000000 |
| 21.N | 1.306548  | 5.050806   | 0.000000 |
| 22.N | 2.419636  | -7.125619  | 0.000000 |
| 23.N | 3.657781  | -9.077517  | 0.000000 |
| 24.H | 5.055331  | 0.362737   | 0.000000 |
| 25.N | -9.690017 | 1.370624   | 0.000000 |
| 26.N | -7.272501 | 5.599303   | 0.000000 |
| 27.H | -3.721420 | 10.085226  | 0.000000 |
| 28.H | 4.045173  | 6.182429   | 0.000000 |
| 29.C | -1.259001 | 6.353908   | 0.000000 |
| 30.C | -6.159406 | -2.097076  | 0.000000 |
| 31.N | 6.031810  | 7.706488   | 0.000000 |
| 32.C | 8.511871  | 2.080789   | 0.000000 |
| 33.O | -3.501556 | -9.093993  | 0.000000 |
| 34.H | -5.114694 | -8.190231  | 0.000000 |
| 35.N | 7.272501  | -5.599303  | 0.000000 |
| 36.N | -2.439968 | -7.056282  | 0.000000 |
| 37.C | 2.454168  | 8.412086   | 0.000000 |
| 38.N | -1.306548 | -5.050806  | 0.000000 |
| 39.C | 1.263726  | 6.382974   | 0.000000 |
| 40.N | 3.720811  | -3.656711  | 0.000000 |
| 41.H | -1.278202 | -10.111100 | 0.000000 |
| 42.N | -2.419636 | 7.125619   | 0.000000 |
| 43.N | -7.380562 | 1.466924   | 0.000000 |
| 44.H | -7.376748 | 0.411954   | 0.000000 |
| 45.C | -1.263726 | -6.382974  | 0.000000 |
| 46.H | 9.650508  | -0.334538  | 0.000000 |
| 47.O | -1.367836 | 5.098198   | 0.000000 |
| 48.N | 9.690017  | -1.370624  | 0.000000 |
| 49.C | -8.511871 | -2.080789  | 0.000000 |
| 50.N | 7.330643  | 1.415063   | 0.000000 |
| 51.H | 4.158865  | 1.929653   | 0.000000 |
| 52.H | 6.872626  | 8.265563   | 0.000000 |
| 53.O | 3.730815  | 3.733685   | 0.000000 |
| 54.N | -4.890922 | 5.641029   | 0.000000 |
| 55.H | 1.278202  | 10.111100  | 0.000000 |
| 56.O | 9.626188  | 1.514820   | 0.000000 |
| 57.O | 3.501556  | 9.093993   | 0.000000 |
| 58.O | 6.125002  | -7.579236  | 0.000000 |
| 59.C | 6.159406  | 2.097076   | 0.000000 |
| 60.H | -3.750555 | 2.636910   | 0.000000 |
| 61.N | 5.027120  | 1.393922   | 0.000000 |
| 62.C | -0.010626 | 7.063818   | 0.000000 |
| 63.H | -5.055331 | -0.362737  | 0.000000 |
| 64.H | -8.117334 | 6.162095   | 0.000000 |
| 65.C | 0.010626  | -7.063818  | 0.000000 |
| 66.C | 2.436966  | -8.496170  | 0.000000 |
| 67.N | -8.485292 | -3.498535  | 0.000000 |
| 68.C | -6.122637 | 3.522382   | 0.000000 |
| 69.H | 2.213714  | 4.559654   | 0.000000 |

|       |            |           |          |
|-------|------------|-----------|----------|
| 70.H  | 0.408487   | 4.566700  | 0.000000 |
| 71.C  | -4.872741  | -4.267273 | 0.000000 |
| 72.O  | -5.098834  | 1.364267  | 0.000000 |
| 73.C  | 6.131987   | -2.086269 | 0.000000 |
| 74.N  | 4.960714   | 5.658233  | 0.000000 |
| 75.C  | 1.259001   | -6.353908 | 0.000000 |
| 76.C  | 7.331148   | 4.254567  | 0.000000 |
| 77.C  | -6.131987  | 2.086269  | 0.000000 |
| 78.N  | 7.380562   | -1.466924 | 0.000000 |
| 79.N  | 2.439968   | 7.056282  | 0.000000 |
| 80.H  | -6.872626  | -8.265563 | 0.000000 |
| 81.N  | -6.031810  | -7.706488 | 0.000000 |
| 82.H  | -9.521114  | 4.079805  | 0.000000 |
| 83.C  | -6.138926  | -6.358612 | 0.000000 |
| 84.N  | -5.027120  | -1.393922 | 0.000000 |
| 85.C  | -0.018731  | 8.476631  | 0.000000 |
| 86.H  | -2.213714  | -4.559654 | 0.000000 |
| 87.C  | -6.057979  | 6.331238  | 0.000000 |
| 88.C  | 8.576152   | -2.137192 | 0.000000 |
| 89.C  | 4.895935   | -4.285706 | 0.000000 |
| 90.H  | 4.535309   | -8.525292 | 0.000000 |
| 91.N  | -1.213150  | -9.098062 | 0.000000 |
| 92.H  | -9.650508  | 0.334538  | 0.000000 |
| 93.H  | -2.841941  | 4.196791  | 0.000000 |
| 94.H  | -8.293835  | -6.205421 | 0.000000 |
| 95.O  | -3.730815  | -3.733685 | 0.000000 |
| 96.O  | 1.367836   | -5.098198 | 0.000000 |
| 97.H  | -3.331324  | 6.594845  | 0.000000 |
| 98.H  | 9.395109   | 3.948772  | 0.000000 |
| 99.C  | 1.222115   | -9.200470 | 0.000000 |
| 100.N | 1.213150   | 9.098062  | 0.000000 |
| 101.C | 4.872741   | 4.267273  | 0.000000 |
| 102.C | -8.576152  | 2.137192  | 0.000000 |
| 103.C | 6.057979   | -6.331238 | 0.000000 |
| 104.C | 7.356261   | 5.658621  | 0.000000 |
| 105.C | 6.122637   | -3.522382 | 0.000000 |
| 106.H | 3.331324   | -6.594845 | 0.000000 |
| 107.C | -6.111728  | -3.541074 | 0.000000 |
| 108.C | 0.018731   | -8.476631 | 0.000000 |
| 109.H | 3.750555   | -2.636910 | 0.000000 |
| 110.N | -7.330643  | -1.415063 | 0.000000 |
| 111.C | -7.350215  | 4.221777  | 0.000000 |
| 112.C | -4.895935  | 4.285706  | 0.000000 |
| 113.N | 8.485292   | 3.498535  | 0.000000 |
| 114.N | -4.960714  | -5.658233 | 0.000000 |
| 115.H | -1.226938  | 10.285825 | 0.000000 |
| 116.H | -4.535309  | 8.525292  | 0.000000 |
| 117.H | 5.114694   | 8.190231  | 0.000000 |
| 118.H | -10.594543 | 1.819356  | 0.000000 |
| 119.C | -7.356261  | -5.658621 | 0.000000 |
| 120.H | 8.293835   | 6.205421  | 0.000000 |
| 121.C | -1.222115  | 9.200470  | 0.000000 |
| 122.H | 7.376748   | -0.411954 | 0.000000 |
| 123.H | -4.158865  | -1.929653 | 0.000000 |
| 124.C | -2.454168  | -8.412086 | 0.000000 |
| 125.O | -6.125002  | 7.579236  | 0.000000 |
| 126.H | 9.521114   | -4.079805 | 0.000000 |

#### AA rosette

E (ZORA-BLYP-D3(BJ)/TZ2P): -17657.51

|      |           |            |          |
|------|-----------|------------|----------|
| 1.H  | -9.329467 | -3.927922  | 0.000000 |
| 2.O  | 4.983636  | -1.343331  | 0.000000 |
| 3.H  | -1.236227 | 10.190914  | 0.000000 |
| 4.H  | -3.958711 | -6.102930  | 0.000000 |
| 5.O  | -9.585662 | -1.495000  | 0.000000 |
| 6.C  | 7.279737  | -4.186005  | 0.000000 |
| 7.C  | 6.044040  | 6.283267   | 0.000000 |
| 8.H  | 1.236227  | -10.190914 | 0.000000 |
| 9.H  | 3.681953  | -9.978135  | 0.000000 |
| 10.C | -2.420225 | 8.376826   | 0.000000 |
| 11.C | 6.051559  | 3.464516   | 0.000000 |
| 12.C | -8.493145 | 3.502242   | 0.000000 |
| 13.H | 10.482777 | -1.800985  | 0.000000 |
| 14.N | -3.632230 | 8.969227   | 0.000000 |
| 15.H | 8.067263  | -6.115953  | 0.000000 |
| 16.H | -3.888009 | 3.779473   | 0.000000 |
| 17.C | -7.264237 | -4.210395  | 0.000000 |

|      |            |            |          |
|------|------------|------------|----------|
| 18.C | 8.493145   | -3.502242  | 0.000000 |
| 19.H | -4.518478  | 8.430757   | 0.000000 |
| 20.N | 4.836674   | -5.612949  | 0.000000 |
| 21.H | 1.328549   | 5.255896   | 0.000000 |
| 22.N | 2.394745   | -7.012747  | 0.000000 |
| 23.N | 3.632230   | -8.969227  | 0.000000 |
| 24.H | 5.041126   | 8.127124   | 0.000000 |
| 25.N | -9.584178  | 1.339593   | 0.000000 |
| 26.N | -7.212620  | 5.565337   | 0.000000 |
| 27.H | -3.681953  | 9.978135   | 0.000000 |
| 28.H | 3.958711   | 6.102930   | 0.000000 |
| 29.C | -1.229357  | 6.213804   | 0.000000 |
| 30.C | -6.133062  | -2.067490  | 0.000000 |
| 31.N | 5.950715   | 7.629035   | 0.000000 |
| 32.C | 8.474043   | 2.059320   | 0.000000 |
| 33.0 | -3.497539  | -9.048221  | 0.000000 |
| 34.H | -5.041126  | -8.127124  | 0.000000 |
| 35.N | 7.212620   | -5.565337  | 0.000000 |
| 36.N | -2.442280  | -6.994109  | 0.000000 |
| 37.C | 2.452806   | 8.368015   | 0.000000 |
| 38.H | -1.328549  | -5.255896  | 0.000000 |
| 39.C | 1.274709   | 6.345095   | 0.000000 |
| 40.H | 3.888009   | -3.779473  | 0.000000 |
| 41.H | -1.262751  | -10.043497 | 0.000000 |
| 42.N | -2.394745  | 7.012747   | 0.000000 |
| 43.N | -7.271060  | 1.433061   | 0.000000 |
| 44.H | -7.266475  | 0.376871   | 0.000000 |
| 45.C | -1.274709  | -6.345095  | 0.000000 |
| 46.H | 9.560912   | -0.302860  | 0.000000 |
| 47.0 | -1.328880  | 4.986862   | 0.000000 |
| 48.N | 9.584178   | -1.339593  | 0.000000 |
| 49.C | -8.474043  | -2.059320  | 0.000000 |
| 50.N | 7.279111   | 1.381160   | 0.000000 |
| 51.H | -10.482777 | 1.800985   | 0.000000 |
| 52.H | 6.799459   | 8.176765   | 0.000000 |
| 53.0 | 3.654496   | 3.642545   | 0.000000 |
| 54.N | -4.836674  | 5.612949   | 0.000000 |
| 55.H | 1.262751   | 10.043497  | 0.000000 |
| 56.0 | 9.585662   | 1.495000   | 0.000000 |
| 57.0 | 3.497539   | 9.048221   | 0.000000 |
| 58.0 | 6.088086   | -7.553877  | 0.000000 |
| 59.C | 6.133062   | 2.067490   | 0.000000 |
| 60.C | -7.278601  | -5.603096  | 0.000000 |
| 61.H | 5.216908   | 1.475959   | 0.000000 |
| 62.C | 0.024262   | 6.973410   | 0.000000 |
| 63.H | 8.207109   | 6.165329   | 0.000000 |
| 64.H | -8.067263  | 6.115953   | 0.000000 |
| 65.C | -0.024262  | -6.973410  | 0.000000 |
| 66.C | 2.420225   | -8.376826  | 0.000000 |
| 67.N | -8.425395  | -3.462892  | 0.000000 |
| 68.C | -6.027590  | 3.508429   | 0.000000 |
| 69.C | -1.213757  | 9.105687   | 0.000000 |
| 70.H | 7.266475   | -0.376871  | 0.000000 |
| 71.C | -4.766719  | -4.170088  | 0.000000 |
| 72.0 | -4.983636  | 1.343331   | 0.000000 |
| 73.C | 5.996511   | -2.042911  | 0.000000 |
| 74.N | 4.875637   | 5.578851   | 0.000000 |
| 75.C | 1.229357   | -6.213804  | 0.000000 |
| 76.C | 7.264237   | 4.210395   | 0.000000 |
| 77.C | -5.996511  | 2.042911   | 0.000000 |
| 78.N | 7.271060   | -1.433061  | 0.000000 |
| 79.N | 2.442280   | 6.994109   | 0.000000 |
| 80.H | -6.799459  | -8.176765  | 0.000000 |
| 81.N | -5.950715  | -7.629035  | 0.000000 |
| 82.H | -9.444287  | 4.025279   | 0.000000 |
| 83.C | -6.044040  | -6.283267  | 0.000000 |
| 84.H | -5.216908  | -1.475959  | 0.000000 |
| 85.C | -0.014996  | 8.396565   | 0.000000 |
| 86.H | 9.444287   | -4.025279  | 0.000000 |
| 87.C | -6.021239  | 6.309012   | 0.000000 |
| 88.C | 8.465123   | -2.092997  | 0.000000 |
| 89.C | 4.858291   | -4.277278  | 0.000000 |
| 90.H | 4.518478   | -8.430757  | 0.000000 |
| 91.N | -1.213156  | -9.028049  | 0.000000 |
| 92.H | -9.560912  | 0.302860   | 0.000000 |
| 93.C | -2.452806  | -8.368015  | 0.000000 |
| 94.H | -8.207109  | -6.165329  | 0.000000 |

|       |           |           |          |
|-------|-----------|-----------|----------|
| 95.O  | -3.654496 | -3.642545 | 0.000000 |
| 96.O  | 1.328880  | -4.986862 | 0.000000 |
| 97.H  | -3.307169 | 6.480803  | 0.000000 |
| 98.H  | 9.329467  | 3.927922  | 0.000000 |
| 99.C  | 1.213757  | -9.105687 | 0.000000 |
| 100.N | 1.213156  | 9.028049  | 0.000000 |
| 101.C | 4.766719  | 4.170088  | 0.000000 |
| 102.C | -8.465123 | 2.092997  | 0.000000 |
| 103.C | 6.021239  | -6.309012 | 0.000000 |
| 104.C | 7.278601  | 5.603096  | 0.000000 |
| 105.C | 6.027590  | -3.508429 | 0.000000 |
| 106.H | 3.307169  | -6.480803 | 0.000000 |
| 107.C | -6.051559 | -3.464516 | 0.000000 |
| 108.C | 0.014996  | -8.396565 | 0.000000 |
| 109.O | -6.088086 | 7.553877  | 0.000000 |
| 110.N | -7.279111 | -1.381160 | 0.000000 |
| 111.C | -7.279737 | 4.186005  | 0.000000 |
| 112.C | -4.858291 | 4.277278  | 0.000000 |
| 113.N | 8.425395  | 3.462892  | 0.000000 |
| 114.N | -4.875637 | -5.578851 | 0.000000 |

### AAA rosette

E (ZORA-BLYP-D3(BJ)/TZ2P): -18588.50

|      |            |            |          |
|------|------------|------------|----------|
| 1.H  | 4.175757   | -1.861114  | 0.000000 |
| 2.N  | 5.058230   | -1.350909  | 0.000000 |
| 3.H  | -1.214541  | 10.287483  | 0.000000 |
| 4.H  | -4.078805  | -6.174802  | 0.000000 |
| 5.O  | -9.596642  | -1.516165  | 0.000000 |
| 6.C  | 7.361964   | -4.265666  | 0.000000 |
| 7.C  | 6.154460   | 6.352822   | 0.000000 |
| 8.H  | 1.210885   | -10.289175 | 0.000000 |
| 9.H  | 3.716014   | -10.086806 | 0.000000 |
| 10.C | -2.426113  | 8.507771   | 0.000000 |
| 11.C | 6.118344   | 3.545675   | 0.000000 |
| 12.C | -8.581063  | 3.546650   | 0.000000 |
| 13.H | 10.591455  | -1.823900  | 0.000000 |
| 14.N | -3.650959  | 9.077554   | 0.000000 |
| 15.H | 0.476428   | -4.548970  | 0.000000 |
| 16.O | -3.753178  | 3.689748   | 0.000000 |
| 17.C | -7.377219  | -4.245866  | 0.000000 |
| 18.C | 8.577236   | -3.548451  | 0.000000 |
| 19.H | -4.521016  | 8.526358   | 0.000000 |
| 20.O | 4.933968   | -5.585723  | 0.000000 |
| 21.O | 1.318343   | 5.092982   | 0.000000 |
| 22.N | 2.409411   | -7.124376  | 0.000000 |
| 23.N | 3.647267   | -9.079115  | 0.000000 |
| 24.H | 5.122688   | 8.176063   | 0.000000 |
| 25.N | -9.688178  | 1.377705   | 0.000000 |
| 26.N | -7.404873  | 5.624139   | 0.000000 |
| 27.H | -3.719633  | 10.085250  | 0.000000 |
| 28.H | 4.075317   | 6.173138   | 0.000000 |
| 29.C | -1.254792  | 6.384918   | 0.000000 |
| 30.C | -6.104044  | -2.114149  | 0.000000 |
| 31.N | 6.035203   | 7.698401   | 0.000000 |
| 32.C | 8.646502   | 2.284948   | 0.000000 |
| 33.O | -3.487062  | -9.067310  | 0.000000 |
| 34.H | -5.126365  | -8.177909  | 0.000000 |
| 35.N | 7.400985   | -5.625918  | 0.000000 |
| 36.O | -2.370554  | -7.067749  | 0.000000 |
| 37.C | 2.342773   | 8.631203   | 0.000000 |
| 38.O | -1.322139  | -5.094781  | 0.000000 |
| 39.C | 1.218760   | 6.340181   | 0.000000 |
| 40.O | 3.749369   | -3.691401  | 0.000000 |
| 41.H | 5.097039   | -0.317948  | 0.000000 |
| 42.N | -2.413179  | 7.122721   | 0.000000 |
| 43.N | -7.376373  | 1.472422   | 0.000000 |
| 44.H | -7.387156  | 0.442751   | 0.000000 |
| 45.C | -1.222549  | -6.341971  | 0.000000 |
| 46.H | 9.642103   | -0.350455  | 0.000000 |
| 47.N | -1.363139  | 5.056603   | 0.000000 |
| 48.N | 9.684415   | -1.379551  | 0.000000 |
| 49.C | -8.650189  | -2.286728  | 0.000000 |
| 50.O | 7.302961   | 1.481231   | 0.000000 |
| 51.H | -10.595247 | 1.821992   | 0.000000 |
| 52.H | 6.873428   | 8.261919   | 0.000000 |
| 53.N | 3.697415   | 3.706525   | 0.000000 |
| 54.O | -4.937840  | 5.584003   | 0.000000 |



|       |           |           |          |
|-------|-----------|-----------|----------|
| 55.H  | 3.697815  | 2.687174  | 0.000000 |
| 56.0  | 9.592962  | 1.514413  | 0.000000 |
| 57.0  | 3.483414  | 9.065442  | 0.000000 |
| 58.0  | 6.107294  | -7.552402 | 0.000000 |
| 59.C  | 6.100380  | 2.112372  | 0.000000 |
| 60.C  | -7.363763 | -5.656913 | 0.000000 |
| 61.0  | 5.070111  | 1.402462  | 0.000000 |
| 62.C  | -0.013378 | 7.072655  | 0.000000 |
| 63.H  | 8.301525  | 6.193601  | 0.000000 |
| 64.H  | 2.822270  | 4.256648  | 0.000000 |
| 65.C  | 0.009603  | -7.074397 | 0.000000 |
| 66.C  | 2.422389  | -8.509411 | 0.000000 |
| 67.N  | -8.574824 | -3.599648 | 0.000000 |
| 68.C  | -6.133416 | 3.525913  | 0.000000 |
| 69.C  | -1.218988 | 9.203016  | 0.000000 |
| 70.H  | 7.383367  | -0.444521 | 0.000000 |
| 71.C  | -4.905651 | -4.278540 | 0.000000 |
| 72.N  | -5.062044 | 1.349153  | 0.000000 |
| 73.C  | 6.154548  | -2.108686 | 0.000000 |
| 74.N  | 4.961586  | 5.648904  | 0.000000 |
| 75.C  | 1.251004  | -6.386619 | 0.000000 |
| 76.C  | 7.373553  | 4.244084  | 0.000000 |
| 77.C  | -6.158355 | 2.106932  | 0.000000 |
| 78.N  | 7.372574  | -1.474195 | 0.000000 |
| 79.0  | 2.366742  | 7.065924  | 0.000000 |
| 80.H  | -6.877108 | -8.263635 | 0.000000 |
| 81.N  | -6.038848 | -7.700169 | 0.000000 |
| 82.H  | -9.518146 | 4.092533  | 0.000000 |
| 83.C  | -6.158036 | -6.354580 | 0.000000 |
| 84.0  | -5.073752 | -1.404277 | 0.000000 |
| 85.C  | 0.009631  | 8.508894  | 0.000000 |
| 86.H  | 9.514311  | -4.094348 | 0.000000 |
| 87.C  | -6.305329 | 6.345672  | 0.000000 |
| 88.C  | 8.578571  | -2.155432 | 0.000000 |
| 89.C  | 4.879334  | -4.228635 | 0.000000 |
| 90.H  | 4.517282  | -8.527855 | 0.000000 |
| 91.N  | -1.171883 | -9.224495 | 0.000000 |
| 92.H  | -9.645785 | 0.348616  | 0.000000 |
| 93.C  | -2.346474 | -8.632971 | 0.000000 |
| 94.H  | -8.305105 | -6.195416 | 0.000000 |
| 95.N  | -3.701184 | -3.708097 | 0.000000 |
| 96.N  | 1.359395  | -5.058314 | 0.000000 |
| 97.H  | -3.310365 | 6.617376  | 0.000000 |
| 98.H  | 2.273416  | -4.575510 | 0.000000 |
| 99.C  | 1.215293  | -9.204707 | 0.000000 |
| 100.N | 1.168188  | 9.222733  | 0.000000 |
| 101.C | 4.901970  | 4.276823  | 0.000000 |
| 102.C | -8.582368 | 2.153632  | 0.000000 |
| 103.C | 6.301399  | -6.347419 | 0.000000 |
| 104.C | 7.360162  | 5.655136  | 0.000000 |
| 105.C | 6.129594  | -3.527657 | 0.000000 |
| 106.H | 3.306555  | -6.618960 | 0.000000 |
| 107.C | -6.122029 | -3.547442 | 0.000000 |
| 108.C | -0.013354 | -8.510635 | 0.000000 |
| 109.0 | -6.111247 | 7.550632  | 0.000000 |
| 110.0 | -7.306611 | -1.483007 | 0.000000 |
| 111.C | -7.365802 | 4.263889  | 0.000000 |
| 112.C | -4.883165 | 4.226931  | 0.000000 |
| 113.N | 8.571149  | 3.597864  | 0.000000 |
| 114.N | -4.965156 | -5.650636 | 0.000000 |
| 115.H | -2.277148 | 4.573762  | 0.000000 |
| 116.H | -0.480120 | 4.547335  | 0.000000 |
| 117.H | -5.100822 | 0.316186  | 0.000000 |
| 118.H | -4.179558 | 1.859329  | 0.000000 |
| 119.H | -2.825987 | -4.258128 | 0.000000 |
| 120.H | -3.701688 | -2.688751 | 0.000000 |

#### AAA-OH rosette

E (ZORA-BLYP-D3(BJ)/TZ2P): -19298.99

|     |           |            |          |
|-----|-----------|------------|----------|
| 1.H | 4.156026  | -1.916207  | 0.000000 |
| 2.N | 5.028308  | -1.380973  | 0.000000 |
| 3.H | -1.198293 | 10.279188  | 0.000000 |
| 4.H | -4.065974 | -6.160378  | 0.000000 |
| 5.0 | -9.666801 | -1.548872  | 0.000000 |
| 6.C | 7.335249  | -4.266768  | 0.000000 |
| 7.C | 6.153429  | 6.319518   | 0.000000 |
| 8.H | 1.189723  | -10.278898 | 0.000000 |

|      |            |            |          |
|------|------------|------------|----------|
| 9.H  | 3.666577   | -10.090583 | 0.000000 |
| 10.C | -2.397943  | 8.492159   | 0.000000 |
| 11.C | 6.126573   | 3.510501   | 0.000000 |
| 12.C | -8.565608  | 3.560139   | 0.000000 |
| 13.H | 10.570143  | -1.865598  | 0.000000 |
| 14.N | -3.622961  | 9.083360   | 0.000000 |
| 15.H | 0.416199   | -4.560806  | 0.000000 |
| 16.0 | -3.729148  | 3.730072   | 0.000000 |
| 17.C | -7.369405  | -4.222298  | 0.000000 |
| 18.C | 8.557203   | -3.559500  | 0.000000 |
| 19.H | -4.491142  | 8.551963   | 0.000000 |
| 20.N | 4.926694   | -5.682611  | 0.000000 |
| 21.0 | 1.363417   | 5.090868   | 0.000000 |
| 22.N | 2.381362   | -7.111953  | 0.000000 |
| 23.N | 3.614419   | -9.083194  | 0.000000 |
| 24.H | 5.158664   | 8.162170   | 0.000000 |
| 25.N | -9.680126  | 1.408027   | 0.000000 |
| 26.N | -7.353757  | 5.636768   | 0.000000 |
| 27.H | -3.675303  | 10.090736  | 0.000000 |
| 28.H | 4.057636   | 6.161073   | 0.000000 |
| 29.C | -1.226708  | 6.375742   | 0.000000 |
| 30.C | -6.158064  | -2.055250  | 0.000000 |
| 31.N | 6.052963   | 7.675991   | 0.000000 |
| 32.C | 8.453105   | 2.224847   | 0.000000 |
| 33.0 | -3.493983  | -9.142386  | 0.000000 |
| 34.H | -5.166524  | -8.161203  | 0.000000 |
| 35.N | 7.345375   | -5.636205  | 0.000000 |
| 36.N | -2.460561  | -7.111378  | 0.000000 |
| 37.C | 2.297947   | 8.436559   | 0.000000 |
| 38.0 | -1.371863  | -5.090522  | 0.000000 |
| 39.C | 1.292596   | 6.357176   | 0.000000 |
| 40.0 | 3.720811   | -3.729446  | 0.000000 |
| 41.H | 5.064989   | -0.340842  | 0.000000 |
| 42.N | -2.389837  | 7.112201   | 0.000000 |
| 43.N | -7.356469  | 1.490094   | 0.000000 |
| 44.H | -7.370485  | 0.437266   | 0.000000 |
| 45.C | -1.301099  | -6.356846  | 0.000000 |
| 46.H | 9.645390   | -0.389687  | 0.000000 |
| 47.N | -1.324257  | 5.049002   | 0.000000 |
| 48.N | 9.671550   | -1.407260  | 0.000000 |
| 49.C | -8.461518  | -2.224286  | 0.000000 |
| 50.N | 7.382844   | 1.428992   | 0.000000 |
| 51.H | -10.578669 | 1.866460   | 0.000000 |
| 52.H | 6.899236   | 8.224967   | 0.000000 |
| 53.N | 3.708294   | 3.668207   | 0.000000 |
| 54.N | -4.935088  | 5.683214   | 0.000000 |
| 55.H | 3.735494   | 2.645163   | 0.000000 |
| 56.0 | 9.658463   | 1.549524   | 0.000000 |
| 57.0 | 3.485451   | 9.142727   | 0.000000 |
| 58.0 | 6.168723   | -7.593084  | 0.000000 |
| 59.C | 6.149636   | 2.055805   | 0.000000 |
| 60.C | -7.367983  | -5.634185  | 0.000000 |
| 61.0 | 5.088373   | 1.361333   | 0.000000 |
| 62.C | 0.021263   | 7.064546   | 0.000000 |
| 63.H | 8.300846   | 6.173913   | 0.000000 |
| 64.H | 2.825872   | 4.220124   | 0.000000 |
| 65.C | -0.029752  | -7.064233  | 0.000000 |
| 66.C | 2.389437   | -8.491907  | 0.000000 |
| 67.N | -8.560398  | -3.546281  | 0.000000 |
| 68.C | -6.109553  | 3.554414   | 0.000000 |
| 69.C | -1.201856  | 9.194464   | 0.000000 |
| 70.H | 7.361935   | -0.436694  | 0.000000 |
| 71.C | -4.914573  | -4.246350  | 0.000000 |
| 72.N | -5.036850  | 1.381406   | 0.000000 |
| 73.C | 6.128625   | -2.128671  | 0.000000 |
| 74.N | 4.962409   | 5.622546   | 0.000000 |
| 75.C | 1.218255   | -6.375452  | 0.000000 |
| 76.C | 7.360967   | 4.222836   | 0.000000 |
| 77.C | -6.137104  | 2.129197   | 0.000000 |
| 78.N | 7.347937   | -1.489514  | 0.000000 |
| 79.N | 2.452033   | 7.111740   | 0.000000 |
| 80.H | -6.907069  | -8.224684  | 0.000000 |
| 81.N | -6.061018  | -7.675371  | 0.000000 |
| 82.H | -9.503280  | 4.105514   | 0.000000 |
| 83.C | -6.161750  | -6.318926  | 0.000000 |
| 84.0 | -5.096770  | -1.360843  | 0.000000 |
| 85.C | 0.021557   | 8.489700   | 0.000000 |

|       |            |            |          |
|-------|------------|------------|----------|
| 86.H  | 9.494899   | -4.104832  | 0.000000 |
| 87.C  | -6.159450  | 6.212152   | 0.000000 |
| 88.C  | 8.547031   | -2.172502  | 0.000000 |
| 89.C  | 4.852912   | -4.301243  | 0.000000 |
| 90.H  | 4.482701   | -8.551953  | 0.000000 |
| 91.N  | -1.211004  | -9.182816  | 0.000000 |
| 92.H  | -9.654059  | 0.390454   | 0.000000 |
| 93.C  | -2.306477  | -8.436212  | 0.000000 |
| 94.H  | -8.309180  | -6.173449  | 0.000000 |
| 95.N  | -3.716806  | -3.667464  | 0.000000 |
| 96.N  | 1.315810   | -5.048713  | 0.000000 |
| 97.H  | -3.308600  | 6.597946   | 0.000000 |
| 98.H  | 2.234960   | -4.560480  | 0.000000 |
| 99.C  | 1.193323   | -9.194174  | 0.000000 |
| 100.N | 1.202464   | 9.183168   | 0.000000 |
| 101.C | 4.906110   | 4.247007   | 0.000000 |
| 102.C | -8.555521  | 2.173149   | 0.000000 |
| 103.C | 6.151040   | -6.211567  | 0.000000 |
| 104.C | 7.359614   | 5.634709   | 0.000000 |
| 105.C | 6.101165   | -3.553865  | 0.000000 |
| 106.H | 3.300102   | -6.597705  | 0.000000 |
| 107.C | -6.135040  | -3.509930  | 0.000000 |
| 108.C | -0.030073  | -8.489374  | 0.000000 |
| 109.O | -6.177234  | 7.593663   | 0.000000 |
| 110.N | -7.391242  | -1.428424  | 0.000000 |
| 111.C | -7.343628  | 4.267342   | 0.000000 |
| 112.C | -4.861291  | 4.301828   | 0.000000 |
| 113.N | 8.551961   | 3.546837   | 0.000000 |
| 114.N | -4.970766  | -5.621872  | 0.000000 |
| 115.H | -2.243466  | 4.560813   | 0.000000 |
| 116.H | -0.424697  | 4.561030   | 0.000000 |
| 117.H | -5.073573  | 0.341268   | 0.000000 |
| 118.H | -4.164521  | 1.916558   | 0.000000 |
| 119.H | -2.834446  | -4.219399  | 0.000000 |
| 120.H | -3.743960  | -2.644428  | 0.000000 |
| 121.H | 3.220848   | 10.084699  | 0.000000 |
| 122.H | 10.341815  | 2.249784   | 0.000000 |
| 123.H | 7.116758   | -7.835040  | 0.000000 |
| 124.H | -3.229376  | -10.084358 | 0.000000 |
| 125.H | -10.350324 | -2.248958  | 0.000000 |
| 126.H | -7.125296  | 7.835514   | 0.000000 |
